# Supplementary material for: Cell nonautonomous roles of NHR‐49 in promoting longevity and innate immunity
Source: PubMed Central journal article supplement (PMC8282243; doi:10.1111/acel.13413), 2021-06-22
Supplement: ACEL-20-e13413-s004.pdf [file ACEL-20-e13413-s004.pdf]

(S1a) Strains compared by RNA-Seq in present study

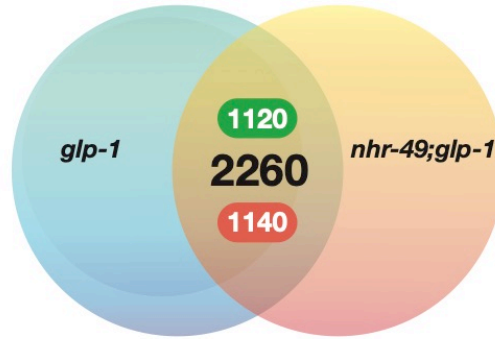

(S1b) Comparison of NHR-49 targets with DAF-16 and TCER-1 targets in *glp-1* mutants

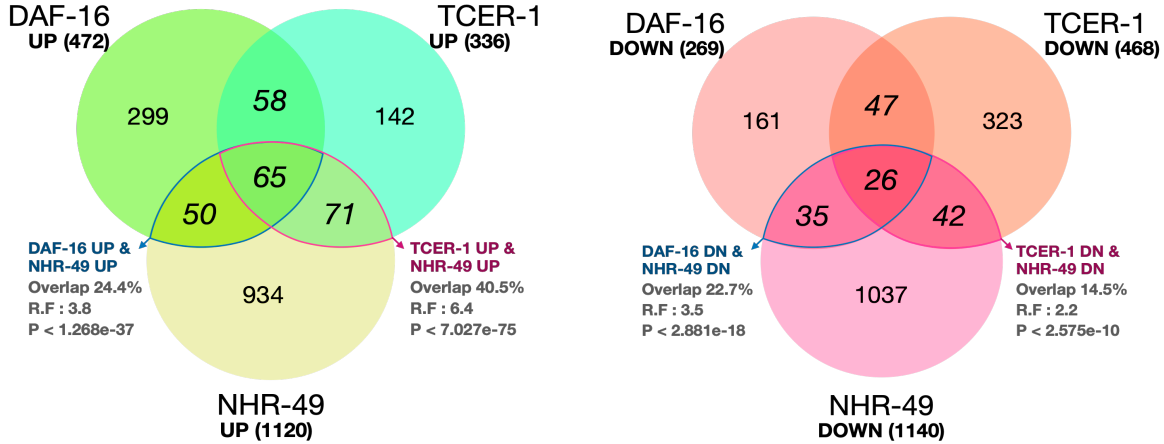

(S1c) NHR-49 UP genes (this study) with previously-identified roles in *glp-1* longevity (Amrit et al., PLoS Gen. 2016)

| Wormbase Gene ID | Public Name     | Overlapping Group  | Avg. % Suppression of Lifespan |
|------------------|-----------------|--------------------|--------------------------------|
| WBGene00000966   | <i>dhs-2</i>    | DAF-16 & TCER-1 UP | -14                            |
| WBGene00000981   | <i>dhs-18</i>   | DAF-16 & TCER-1 UP | -12                            |
| WBGene00001387   | <i>far-3</i>    | DAF-16 & TCER-1 UP | -12                            |
| WBGene00001500   | <i>ftn-1</i>    | DAF-16 & TCER-1 UP | -18                            |
| WBGene00001777   | <i>gst-29</i>   | DAF-16 & TCER-1 UP | -15                            |
| WBGene00004818   | <i>skr-12</i>   | DAF-16 & TCER-1 UP | -22                            |
| WBGene00004994   | <i>spp-9</i>    | DAF-16 & TCER-1 UP | -12                            |
| WBGene00004997   | <i>spp-12</i>   | DAF-16 & TCER-1 UP | -14                            |
| WBGene00007140   | <i>cyp-29A4</i> | DAF-16 & TCER-1 UP | -15                            |
| WBGene00010706   | <i>cyp-14A2</i> | DAF-16 & TCER-1 UP | -17                            |
| WBGene00011362   | <i>cest-1.1</i> | DAF-16 & TCER-1 UP | -19                            |
| WBGene00013904   | <i>ugt-6</i>    | DAF-16 & TCER-1 UP | -21                            |
| WBGene00017390   | F12A10.1        | DAF-16 & TCER-1 UP | -11                            |
| WBGene00020413   | T10E9.3         | DAF-16 & TCER-1 UP | -22                            |
| WBGene00020909   | W01A11.1        | DAF-16 & TCER-1 UP | -17                            |
| WBGene00000975   | <i>dhs-12</i>   | DAF-16 UP          | -17                            |
| WBGene00003473   | <i>mtl-1</i>    | DAF-16 UP          | -22                            |
| WBGene00012404   | Y6G8.2          | DAF-16 UP          | -18                            |
| WBGene00014030   | <i>glb-1</i>    | DAF-16 UP          | -15                            |
| WBGene00021491   | <i>comt-4</i>   | DAF-16 UP          | -11                            |
| WBGene00000982   | <i>dhs-19</i>   | TCER-1 UP          | -22                            |
| WBGene00000986   | <i>dhs-23</i>   | TCER-1 UP          | -20                            |
| WBGene00000988   | <i>dhs-25</i>   | TCER-1 UP          | -21                            |
| WBGene00007362   | <i>cyp-35C1</i> | TCER-1 UP          | -17                            |
| WBGene00007848   | <i>cytb-5.1</i> | TCER-1 UP          | -21                            |
| WBGene00007963   | <i>cyp-25A1</i> | TCER-1 UP          | -10                            |
| WBGene00008499   | <i>cyp-37A1</i> | TCER-1 UP          | -22                            |
| WBGene00010659   | K08D8.5         | TCER-1 UP          | -15                            |
| WBGene00011830   | <i>cyp-29A2</i> | TCER-1 UP          | -10                            |
| WBGene00013594   | Y872A.2         | TCER-1 UP          | -15                            |
| WBGene00015400   | <i>cyp-35A2</i> | TCER-1 UP          | -16                            |
| WBGene00015692   | <i>ugt-25</i>   | TCER-1 UP          | -14                            |
| WBGene00016786   | <i>cyp-35A4</i> | TCER-1 UP          | -20                            |
| WBGene00018958   | <i>cest-27</i>  | TCER-1 UP          | -11                            |
| WBGene00019473   | <i>cyp-35A5</i> | TCER-1 UP          | -13                            |
