# Supplementary material for: Cell nonautonomous roles of NHR‐49 in promoting longevity and innate immunity
Source: PubMed Central journal article supplement (PMC8282243; doi:10.1111/acel.13413), 2021-06-22
Supplement: ACEL-20-e13413-s005.pdf [file ACEL-20-e13413-s005.pdf]

**Table S2a: Impact of *nhr-49(et7)* on PA14 survival (A.1) and OP50 lifespan (A.2)**

| Table S2a.1: SURVIVAL ON PA14 |               |          |        |                    |
|-------------------------------|---------------|----------|--------|--------------------|
| Genotype                      | Trial 1       |          |        | Bonferroni P value |
|                               | n = obs/total | Mean (h) | SE +/- | P (vs N2)          |
| WT                            | 126 / 145     | 54.32    | 1.09   |                    |
| <i>nhr-49(et7) gof</i>        | 94 / 136      | 62.79    | 1.31   | <0.0001            |
| Trial 2                       |               |          |        |                    |
| WT                            | 60 / 117      | 78.4     | 2.66   |                    |
| <i>nhr-49(et7) gof</i>        | 79 / 110      | 74.68    | 3.67   | 0.4354             |
| Trial 3                       |               |          |        |                    |
| WT                            | 102 / 129     | 76.98    | 2.25   |                    |
| <i>nhr-49(et7) gof</i>        | 73 / 118      | 76.09    | 2.57   | 1                  |
| Trial 4 <sup>#</sup>          |               |          |        |                    |
| WT                            | 87 / 150      | 77.36    | 1.79   |                    |
| <i>nhr-49(et7) gof</i>        | 60 / 130      | 89.35    | 2.22   | <0.0001            |
| Trial 5~                      |               |          |        |                    |
| WT                            | 94 / 120      | 75.16    | 2.74   |                    |
| <i>nhr-49(et7) gof</i>        | 94 / 140      | 76.77    | 2.3    | 1                  |
| Trial 6\$                     |               |          |        |                    |
| WT                            | 78 / 106      | 67.46    | 2.15   |                    |
| <i>nhr-49(et7) gof</i>        | 93 / 125      | 77.88    | 1.85   | 0.0002             |
| Table S2a.2: SURVIVAL ON OP50 |               |          |        |                    |
| Genotype                      | Trial 1◇      |          |        | Bonferroni P value |
|                               | n = obs/total | Mean (h) | SE +/- | P (vs N2)          |
| WT                            | 99 / 120      | 15.61    | 0.46   |                    |
| <i>nhr-49(et7) gof</i>        | 78 / 118      | 16.75    | 0.54   | 0.4299             |
| Trial 2†                      |               |          |        |                    |
| WT                            | 103 / 136     | 16.49    | 0.44   |                    |
| <i>nhr-49(et7) gof</i>        | 86 / 117      | 13.46    | 0.66   | 0.0422             |

Special characters #, ~, \$, ◇, † on trial headings denote the trial was performed alongside similarly-labeled experiments in Table S6A.

Underlined Trials in S2a and S2b shown in Figs. 2b and 2c, respectively.

**Table S2b: Impact of Fenofibrate on survival upon PA14 exposure**

| SURVIVAL ON PA14 |             |               |          |        |                    |                   |
|------------------|-------------|---------------|----------|--------|--------------------|-------------------|
| Genotype         | Treatment   | Trial 1       |          |        | Bonferroni P-value |                   |
|                  |             | n = obs/total | Mean (h) | SE +/- | P (vs WT Control)  | P (vs FF Control) |
| WT               | Control     | 103 / 129     | 56.81    | 1.08   |                    |                   |
|                  | Fenofibrate | 93 / 135      | 62.1     | 1.26   | 0.0041             | 0.0041            |
| <i>nhr-49</i>    | Control     | 107 / 134     | 47.69    | 0.98   | <0.0001            |                   |
|                  | Fenofibrate | 104 / 134     | 45.33    | 0.89   | <0.0001            | 0.072             |
| Trial 2          |             |               |          |        |                    |                   |
| WT               | Control     | 82 / 131      | 61.69    | 0.99   |                    |                   |
|                  | Fenofibrate | 78 / 137      | 65.92    | 1.78   | < 0.0001           | < 0.0001          |
| <i>nhr-49</i>    | Control     | 83 / 130      | 41.33    | 0.71   | < 0.0001           |                   |
|                  | Fenofibrate | 94 / 131      | 41.36    | 0.8    | < 0.0001           | 0.0004            |
| Trial 3          |             |               |          |        |                    |                   |
| WT               | Control     | 103 / 150     | 59.21    | 1.09   |                    |                   |
|                  | Fenofibrate | 104 / 150     | 63.16    | 1.43   | 0.0187             | 0.0187            |
| <i>nhr-49</i>    | Control     | 62 / 119      | 44.82    | 0.76   | < 0.0001           |                   |
|                  | Fenofibrate | 110 / 149     | 40.99    | 0.83   | < 0.0001           | 1                 |
| Trial 4          |             |               |          |        |                    |                   |
| WT               | Control     | 131 / 160     | 66       | 1.19   |                    |                   |
|                  | Fenofibrate | 148 / 160     | 71.86    | 1.11   | 0.0006             | 0.0006            |
| <i>nhr-49</i>    | Control     | 126 / 160     | 47.92    | 0.7    | < 0.0001           |                   |
|                  | Fenofibrate | 152 / 161     | 47.44    | 0.71   | < 0.0001           | 1                 |
| Trial 5          |             |               |          |        |                    |                   |
| WT               | Control     | 108 / 150     | 66.75    | 1.37   |                    |                   |
|                  | Fenofibrate | 90 / 145      | 64.73    | 1.32   | 1                  | 1                 |
| <i>nhr-49</i>    | Control     | 116 / 122     | 50.49    | 0.99   | < 0.0001           |                   |
|                  | Fenofibrate | 110 / 120     | 51.3     | 0.95   | < 0.0001           | 1                 |
| Trial 6          |             |               |          |        |                    |                   |
| WT               | Control     | 103 / 120     | 78.28    | 1.73   |                    |                   |
|                  | Fenofibrate | 84 / 120      | 70.11    | 1.42   | 0.0017             | 0.0017            |
| <i>nhr-49</i>    | Control     | 150 / 159     | 51.94    | 0.72   | < 0.0001           |                   |
|                  | Fenofibrate | 148 / 160     | 52.91    | 0.77   | < 0.0001           | 1                 |
| Trial 7          |             |               |          |        |                    |                   |
| WT               | Control     | 95 / 146      | 61.37    | 1.46   |                    |                   |
|                  | Fenofibrate | 91 / 139      | 63.24    | 1.66   | 0.041              | 0.041             |
| <i>nhr-49</i>    | Control     | 102 / 146     | 46.38    | 0.88   | < 0.0001           |                   |
|                  | Fenofibrate | 123 / 151     | 48.08    | 0.65   | < 0.0001           | < 0.0001          |
| Trial 8          |             |               |          |        |                    |                   |
| WT               | Control     | 53/150        | 70.09    | 2.47   |                    |                   |
|                  | Fenofibrate | 65/150        | 61.58    | 2.17   | 0.0066             | 0.0066            |
| <i>nhr-49</i>    | Control     | 127/150       | 46.82    | 0.76   | < 0.0001           |                   |
|                  | Fenofibrate | 108/150       | 41.86    | 0.49   | < 0.0001           | < 0.0001          |

**Table S3a: Impact of endogenous promoter-driven NHR-49 expression on survival of *nhr-49;glp-1* mutants on PA14 (a.1) or OP50 (a.2)**

| Table S3a.1: SURVIVAL ON PA14 |                                                                        |                   |                |        |                    |                                        |                      |
|-------------------------------|------------------------------------------------------------------------|-------------------|----------------|--------|--------------------|----------------------------------------|----------------------|
| Strain                        | Background/Genotype                                                    | Trial 1*          |                |        | Bonferroni P-value |                                        |                      |
|                               |                                                                        | n = obs/<br>total | Mean (h)       | SE +/- | P (vs N2)          | P (vs <i>nhr-49;</i><br><i>glp-1</i> ) | P (vs <i>glp-1</i> ) |
| WT                            | Wild type                                                              | 100 / 122         | 59.17          | 1.14   |                    |                                        |                      |
| AGP22                         | <i>nhr-49;glp-1</i>                                                    | 111 / 121         | 56.25          | 1.42   | 0.7488             |                                        |                      |
| CF1903                        | <i>glp-1</i>                                                           | 117 / 124         | 80.71          | 1.62   | <0.0001            | <0.0001                                |                      |
| AGP34                         | <i>nhr-49;glp-1 glmEx5 [Pnhr-49::<i>nhr-49::GFP + Pmyo-2::mCh]</i></i> | 79 / 113          | 43.77          | 1.36   | <0.0001            | <0.0001                                | <0.0001              |
| Trial 2#                      |                                                                        |                   |                |        |                    |                                        |                      |
| WT                            | Wild type                                                              | 68/120            | 72.12          | 2.14   |                    |                                        |                      |
| AGP22                         | <i>nhr-49;glp-1</i>                                                    | 108/120           | 57.92          | 1.35   | <0.0001            |                                        |                      |
| CF1903                        | <i>glp-1</i>                                                           | 105/120           | 82.88          | 2.08   | 0.0042             | <0.0001                                |                      |
| AGP34                         | <i>nhr-49;glp-1 glmEx5 [Pnhr-49::<i>nhr-49::GFP + Pmyo-2::mCh]</i></i> | 95/120            | 43.33          | 1.74   | <0.0001            | <0.0001                                | <0.0001              |
| Trial 3^                      |                                                                        |                   |                |        |                    |                                        |                      |
| WT                            | Wild type                                                              | 67 / 114          | 75.62          | 1.71   |                    |                                        |                      |
| AGP22                         | <i>nhr-49;glp-1</i>                                                    | 98 / 111          | 53.32          | 1.26   | <0.0001            |                                        |                      |
| CF1903                        | <i>glp-1</i>                                                           | 104 / 108         | 89.65          | 2.83   | 0.0429             | <0.0001                                |                      |
| AGP34                         | <i>nhr-49;glp-1 glmEx5 [Pnhr-49::<i>nhr-49::GFP + Pmyo-2::mCh]</i></i> | 69 / 78           | 35.59          | 1.37   | <0.0001            | <0.0001                                | <0.0001              |
| Trial 4\$                     |                                                                        |                   |                |        |                    |                                        |                      |
| WT                            | Wild type                                                              | 88 / 128          | 92.05          | 1.99   |                    |                                        |                      |
| AGP22                         | <i>nhr-49;glp-1</i>                                                    | 106 / 132         | 69.89          | 1.69   | <0.0001            |                                        |                      |
| CF1903                        | <i>glp-1</i>                                                           | 101 / 131         | 106.42         | 2.74   | 0.0004             | <0.0001                                |                      |
| AGP34                         | <i>nhr-49;glp-1 glmEx5 [Pnhr-49::<i>nhr-49::GFP + Pmyo-2::mCh]</i></i> | 80 / 111          | 54.13          | 2.67   | <0.0001            | <0.0001                                | <0.0001              |
| Table S3a.2: SURVIVAL ON OP50 |                                                                        |                   |                |        |                    |                                        |                      |
| Strain                        | Background Genotype                                                    | Trial 1@          |                |        | Bonferroni P-value |                                        |                      |
|                               |                                                                        | n = obs/<br>total | Mean<br>(days) | SE +/- | P (vs N2)          | P (vs <i>nhr-49;</i><br><i>glp-1</i> ) | P (vs <i>glp-1</i> ) |
| AGP22                         | <i>nhr-49;glp-1</i>                                                    | 72/72             | 11.27          | 0.26   |                    |                                        |                      |
| CF1903                        | <i>glp-1</i>                                                           | 65/77             | 25.78          | 0.98   |                    | <0.0001                                |                      |
| AGP34                         | <i>nhr-49;glp-1 glmEx5 [Pnhr-49::<i>nhr-49::GFP + Pmyo-2::mCh]</i></i> | 14/26             | 24.6           | 1.39   |                    | <0.0001                                | 1                    |
| Trial 2&                      |                                                                        |                   |                |        |                    |                                        |                      |
| WT                            | Wild type                                                              | 52/71             | 16.26          | 0.91   |                    |                                        |                      |
| AGP22                         | <i>nhr-49;glp-1</i>                                                    | 55/72             | 11.28          | 0.26   | 0.0002             |                                        |                      |
| CF1903                        | <i>glp-1</i>                                                           | 51/70             | 24.43          | 1.08   | <0.0001            | <0.0001                                |                      |
| AGP34                         | <i>nhr-49;glp-1 glmEx5 [Pnhr-49::<i>nhr-49::GFP + Pmyo-2::mCh]</i></i> | 59/60             | 23.72          | 1.32   | <0.0001            | <0.0001                                | 1                    |
| Trial 3~                      |                                                                        |                   |                |        |                    |                                        |                      |
| AGP22                         | <i>nhr-49;glp-1</i>                                                    | 125 / 142         | 9.96           | 0.07   |                    |                                        |                      |
| CF1903                        | <i>glp-1</i>                                                           | 100 / 107         | 18.49          | 0.53   |                    | <0.0001                                |                      |
| AGP34                         | <i>nhr-49;glp-1 glmEx5 [Pnhr-49::<i>nhr-49::GFP + Pmyo-2::mCh]</i></i> | 102 / 124         | 15.61          | 0.58   |                    | <0.0001                                | 0.0046               |

\*, #, ^, \$, & and ~ on different tabs/sub-sections of Table S3 denote trials performed at the same time

Underlined Trials shown in Fig. 3

**Table S3b: Impact of neuronal (*unc-119*) promoter-driven NHR-49 expression on survival of *nhr-49;glp-1* mutants on PA14 (b.1) or OP50 (b.2)**

**Table S3b. 1: SURVIVAL ON PA14**

| Strain   | Background/Genotype                                                             | Trial 1*          |          |        | Bonferroni P-value |                             |                      |
|----------|---------------------------------------------------------------------------------|-------------------|----------|--------|--------------------|-----------------------------|----------------------|
|          |                                                                                 | n = obs/<br>total | Mean (h) | SE +/- | P (vs N2)          | P (vs <i>nhr-49;glp-1</i> ) | P (vs <i>glp-1</i> ) |
| WT       | Wild type                                                                       | 100 / 122         | 59.17    | 1.14   |                    |                             |                      |
| AGP22    | <i>nhr-49;glp-1</i>                                                             | 111 / 121         | 56.25    | 1.42   | 0.7488             |                             |                      |
| CF1903   | <i>glp-1</i>                                                                    | 117 / 124         | 80.71    | 1.62   | <0.0001            | <0.0001                     |                      |
| AGP115   | <i>nhr-49;glp-1 glmEx29 [Punc-119::<i>nhr-49::GFP</i> + <i>Pmyo-2::mCh</i>]</i> | 107 / 120         | 74.76    | 2.92   | <0.0001            | <0.0001                     | 1                    |
| Trial 2# |                                                                                 |                   |          |        |                    |                             |                      |
| WT       | Wild type                                                                       | 68/120            | 72.12    | 2.14   |                    |                             |                      |
| AGP22    | <i>nhr-49;glp-1</i>                                                             | 108/120           | 57.92    | 1.35   | <0.0001            |                             |                      |
| CF1903   | <i>glp-1</i>                                                                    | 105/120           | 82.88    | 2.08   | 0.0042             | <0.0001                     |                      |
| AGP115   | <i>nhr-49;glp-1 glmEx29 [Punc-119::<i>nhr-49::GFP</i> + <i>Pmyo-2::mCh</i>]</i> | 104/120           | 77.91    | 3.28   | 0.1476             | <0.0001                     | 1                    |
| Trial 3^ |                                                                                 |                   |          |        |                    |                             |                      |
| WT       | Wild type                                                                       | 67 / 114          | 75.62    | 1.71   |                    |                             |                      |
| AGP22    | <i>nhr-49;glp-1</i>                                                             | 98 / 111          | 53.32    | 1.26   | <0.0001            |                             |                      |
| CF1903   | <i>glp-1</i>                                                                    | 104 / 108         | 89.65    | 2.83   | 0.0429             | <0.0001                     |                      |
| AGP115   | <i>nhr-49;glp-1 glmEx29 [Punc-119::<i>nhr-49::GFP</i> + <i>Pmyo-2::mCh</i>]</i> | 90 / 102          | 92.09    | 3.49   | 0.0028             | <0.0001                     | 1                    |

**Table Sb.2: SURVIVAL ON OP50**

| Strain  | Background Genotype                                                             | Trial 1&          |             |        | Bonferroni P-value |                             |                      |
|---------|---------------------------------------------------------------------------------|-------------------|-------------|--------|--------------------|-----------------------------|----------------------|
|         |                                                                                 | n = obs/<br>total | Mean (days) | SE +/- | P (vs N2)          | P (vs <i>nhr-49;glp-1</i> ) | P (vs <i>glp-1</i> ) |
| WT      | Wild type                                                                       | 52/71             | 16.26       | 0.91   |                    |                             |                      |
| AGP22   | <i>nhr-49;glp-1</i>                                                             | 55/72             | 11.28       | 0.26   | 0.0002             |                             |                      |
| CF1903  | <i>glp-1</i>                                                                    | 51/70             | 24.43       | 1.08   | <0.0001            | <0.0001                     |                      |
| AGP115  | <i>nhr-49;glp-1 glmEx29 [Punc-119::<i>nhr-49::GFP</i> + <i>Pmyo-2::mCh</i>]</i> | 66/71             | 24.41       | 1.04   | <0.0001            | <0.0001                     | 1                    |
| Trial 2 |                                                                                 |                   |             |        |                    |                             |                      |
| WT      | Wild type                                                                       | 71 / 100          | 23.8        | 0.58   |                    |                             |                      |
| AGP22   | <i>nhr-49;glp-1</i>                                                             | 110 / 145         | 11.38       | 0.19   | <0.0001            |                             |                      |
| CF1903  | <i>glp-1</i>                                                                    | 83 / 84           | 22.58       | 1.06   | 1                  | <0.0001                     |                      |
| AGP115  | <i>nhr-49;glp-1 glmEx29 [Punc-119::<i>nhr-49::GFP</i> + <i>Pmyo-2::mCh</i>]</i> | 67 / 92           | 23.97       | 0.45   | 1                  | <0.0001                     | 1                    |
| Trial 3 |                                                                                 |                   |             |        |                    |                             |                      |
| WT      | Wild type                                                                       | 71 / 82           | 17.99       | 0.58   |                    |                             |                      |
| AGP22   | <i>nhr-49;glp-1</i>                                                             | 63 / 65           | 11.11       | 0.33   | <0.0001            |                             |                      |
| CF1903  | <i>glp-1</i>                                                                    | 109 / 121         | 24.25       | 0.91   | <0.0001            | <0.0001                     |                      |
| AGP115  | <i>nhr-49;glp-1 glmEx29 [Punc-119::<i>nhr-49::GFP</i> + <i>Pmyo-2::mCh</i>]</i> | 83 / 103          | 24.9        | 0.55   | <0.0001            | <0.0001                     | 1                    |

\*, #, ^, \$, & and ~ on different tabs/sub-sections of Table S3 denote trials performed at the same time

Underlined Trials shown in Fig. 3

**Table S3c: Impact of intestinal (*gly-19*) promoter-driven NHR-49 expression on survival of *nhr-49;glp-1* mutants on PA14 (c.1) and OP50 (c.2)**

**Table S3c. 1: SURVIVAL ON PA14**

| Strain    | Background/Genotype                                                                        | Trial 1*          |          |        | Bonferroni P-value |                             |                      |
|-----------|--------------------------------------------------------------------------------------------|-------------------|----------|--------|--------------------|-----------------------------|----------------------|
|           |                                                                                            | n = obs/<br>total | Mean (h) | SE +/- | P (vs N2)          | P (vs <i>nhr-49;glp-1</i> ) | P (vs <i>glp-1</i> ) |
| WT        | Wildtype                                                                                   | 100 / 122         | 59.17    | 1.14   |                    |                             |                      |
| AGP22     | <i>nhr-49;glp-1</i>                                                                        | 111 / 121         | 56.25    | 1.42   | 0.7488             |                             |                      |
| CF1903    | <i>glp-1</i>                                                                               | 117 / 124         | 80.71    | 1.62   | <0.0001            | <0.0001                     |                      |
| AGP43     | <i>nhr-49;glp-1 glmEx10</i><br>[ <i>Pgly-19::nhr-49::GFP</i> +<br><i>Pmyo-2::mCherry</i> ] | 68 / 79           | 47.82    | 2.57   | 0.0026             | 0.0693                      | <0.0001              |
| Trial 2\$ |                                                                                            |                   |          |        |                    |                             |                      |
| WT        | Wildtype                                                                                   | 88 / 128          | 92.05    | 1.99   |                    |                             |                      |
| AGP22     | <i>nhr-49;glp-1</i>                                                                        | 106 / 132         | 69.89    | 1.69   | <0.0001            |                             |                      |
| CF1903    | <i>glp-1(e2144)</i>                                                                        | 101 / 131         | 106.42   | 2.74   | 0.0004             | <0.0001                     |                      |
| AGP43     | <i>nhr-49;glp-1 glmEx10</i><br>[ <i>Pgly-19::nhr-49::GFP</i> +<br><i>Pmyo-2::mCherry</i> ] | 86 / 140          | 77.36    | 3.45   | 0.0086             | 0.0726                      | <0.0001              |
| Trial 3   |                                                                                            |                   |          |        |                    |                             |                      |
| WT        | Wildtype                                                                                   | 94 / 135          | 89.9     | 2.17   |                    |                             |                      |
| AGP22     | <i>nhr-49;glp-1</i>                                                                        | 124 / 139         | 61.35    | 1.3    | <0.0001            |                             |                      |
| CF1903    | <i>glp-1(e2144)</i>                                                                        | 94 / 139          | 93.57    | 2.96   | 1                  | <0.0001                     |                      |
| AGP43     | <i>nhr-49;glp-1 glmEx10</i><br>[ <i>Pgly-19::nhr-49::GFP</i> +<br><i>Pmyo-2::mCherry</i> ] | 93 / 140          | 61.68    | 2.39   | <0.0001            | 1                           | <0.0001              |

**Table S3c.2: SURVIVAL ON OP50**

| Strain   | Background Genotype                                                                        | Trial 1@          |                |        | Bonferroni P-value |                             |                      |
|----------|--------------------------------------------------------------------------------------------|-------------------|----------------|--------|--------------------|-----------------------------|----------------------|
|          |                                                                                            | n = obs/<br>total | Mean<br>(days) | SE +/- | P (vs N2)          | P (vs <i>nhr-49;glp-1</i> ) | P (vs <i>glp-1</i> ) |
| AGP22    | <i>nhr-49;glp-1</i>                                                                        | 72/72             | 11.27          | 0.26   |                    |                             |                      |
| CF1903   | <i>glp-1(e2144)</i>                                                                        | 65/77             | 25.78          | 0.98   |                    | <0.0001                     |                      |
| AGP43    | <i>nhr-49;glp-1 glmEx10</i><br>[ <i>Pgly-19::nhr-49::GFP</i> +<br><i>Pmyo-2::mCherry</i> ] | 41/63             | 19.79          | 0.95   |                    | <0.0001                     | 0.0002               |
| Trial 2~ |                                                                                            |                   |                |        |                    |                             |                      |
| AGP22    | <i>nhr-49;glp-1</i>                                                                        | 125 / 142         | 9.96           | 0.07   |                    |                             |                      |
| CF1903   | <i>glp-1(e2144)</i>                                                                        | 100 / 107         | 18.49          | 0.53   |                    | <0.0001                     |                      |
| AGP43    | <i>nhr-49;glp-1 glmEx10</i><br>[ <i>Pgly-19::nhr-49::GFP</i> +<br><i>Pmyo-2::mCherry</i> ] | 118 / 137         | 16.55          | 0.2    |                    | <0.0001                     | 0.0011               |

\*, #, ^, \$, & and ~ on different tabs/sub-sections of Table S3 denote trials performed at the same time  
Underlined Trials shown in Fig. 3

**Table S3d: Impact of muscle (*myo-3*) promoter-driven NHR-49 expression on survival of *nhr-49;glp-1* mutants on PA14 (d.1) and OP50 (d.2)**

**Table S3d. 1: SURVIVAL ON PA14**

| Strain   | Background/Genotype                                                                      | Trial 1*          |          |        | Bonferroni P-value |                             |                      |
|----------|------------------------------------------------------------------------------------------|-------------------|----------|--------|--------------------|-----------------------------|----------------------|
|          |                                                                                          | n = obs/<br>total | Mean (h) | SE +/- | P (vs N2)          | P (vs <i>nhr-49;glp-1</i> ) | P (vs <i>glp-1</i> ) |
| WT       | Wildtype                                                                                 | 100 / 122         | 59.17    | 1.14   |                    |                             |                      |
| AGP22    | <i>nhr-49;glp-1</i>                                                                      | 111 / 121         | 56.25    | 1.42   | 0.7488             |                             |                      |
| CF1903   | <i>glp-1</i>                                                                             | 117 / 124         | 80.71    | 1.62   | <0.0001            | <0.0001                     |                      |
| AGP279   | <i>nhr-49;glp-1 glmEx7</i><br>[ <i>Pmyo-3::nhr-49::GFP</i> +<br><i>Pmyo-2::mCherry</i> ] | 109 / 115         | 52.44    | 1.67   | 0.3334             | 1                           | <0.0001              |
| Trial 2# |                                                                                          |                   |          |        |                    |                             |                      |
| WT       | Wildtype                                                                                 | 68/120            | 72.12    | 2.14   |                    |                             |                      |
| AGP22    | <i>nhr-49;glp-1</i>                                                                      | 108/120           | 57.92    | 1.35   | <0.0001            |                             |                      |
| CF1903   | <i>glp-1</i>                                                                             | 105/120           | 82.88    | 2.08   | 0.0042             | <0.0001                     |                      |
| AGP279   | <i>nhr-49;glp-1 glmEx7</i><br>[ <i>Pmyo-3::nhr-49::GFP</i> +<br><i>Pmyo-2::mCherry</i> ] | 108/120           | 62.52    | 2.29   | 0.1479             | <0.0001                     | <0.0001              |
| Trial 3^ |                                                                                          |                   |          |        |                    |                             |                      |
| WT       | Wildtype                                                                                 | 67 / 114          | 75.62    | 1.71   |                    |                             |                      |
| AGP22    | <i>nhr-49;glp-1</i>                                                                      | 98 / 111          | 53.32    | 1.26   | <0.0001            |                             |                      |
| CF1903   | <i>glp-1</i>                                                                             | 104 / 108         | 89.65    | 2.83   | 0.0429             | <0.0001                     |                      |
| AGP279   | <i>nhr-49;glp-1 glmEx7</i><br>[ <i>Pmyo-3::nhr-49::GFP</i> +<br><i>Pmyo-2::mCherry</i> ] | 105 / 115         | 63.53    | 1.76   | <0.0001            | <0.0001                     | <0.0001              |

**Table S3d.2: SURVIVAL ON OP50**

| Strain   | Background Genotype                                                                      | Trial 1@          |                |        | Bonferroni P-value |                             |                      |
|----------|------------------------------------------------------------------------------------------|-------------------|----------------|--------|--------------------|-----------------------------|----------------------|
|          |                                                                                          | n = obs/<br>total | Mean<br>(days) | SE +/- | P (vs N2)          | P (vs <i>nhr-49;glp-1</i> ) | P (vs <i>glp-1</i> ) |
| AGP22    | <i>nhr-49;glp-1</i>                                                                      | 72/72             | 11.27          | 0.26   |                    |                             |                      |
| CF1903   | <i>glp-1</i>                                                                             | 65/77             | 25.78          | 0.98   |                    | <0.0001                     |                      |
| AGP279   | <i>nhr-49;glp-1 glmEx7</i><br>[ <i>Pmyo-3::nhr-49::GFP</i> +<br><i>Pmyo-2::mCherry</i> ] | 34/59             | 21.4           | 1.02   |                    | <0.0001                     | 0.0113               |
| Trial 2~ |                                                                                          |                   |                |        |                    |                             |                      |
| AGP22    | <i>nhr-49;glp-1</i>                                                                      | 125 / 142         | 9.96           | 0.07   |                    |                             |                      |
| CF1903   | <i>glp-1</i>                                                                             | 100 / 107         | 18.49          | 0.53   |                    | <0.0001                     |                      |
| AGP279   | <i>nhr-49;glp-1 glmEx7</i><br>[ <i>Pmyo-3::nhr-49::GFP</i> +<br><i>Pmyo-2::mCherry</i> ] | 109 / 116         | 17.71          | 0.33   |                    | <0.0001                     | 1                    |

\*, #, ^, \$, & and ~ on different tabs/sub-sections of Table S3 denote trials performed at the same time  
Underlined Trials shown in Fig. 3

**Table S3e: Impact of hypodermal (*col-12*) promoter-driven NHR-49 expression on survival of *nhr-49;glp-1* mutants on PA14 (e.1) and OP50 (e.2)**

| Table S3e.1: SURVIVAL ON PA14 |                                                                                            |                   |                |        |                    |                             |                      |
|-------------------------------|--------------------------------------------------------------------------------------------|-------------------|----------------|--------|--------------------|-----------------------------|----------------------|
| Strain                        | Background/Genotype                                                                        | Trial 1*          |                |        | Bonferroni P-value |                             |                      |
|                               |                                                                                            | n = obs/<br>total | Mean (h)       | SE +/- | P (vs N2)          | P (vs <i>nhr-49;glp-1</i> ) | P (vs <i>glp-1</i> ) |
| WT                            | Wildtype                                                                                   | 100 / 122         | 59.17          | 1.14   |                    |                             |                      |
| AGP22                         | <i>nhr-49;glp-1</i>                                                                        | 111 / 121         | 56.25          | 1.42   | 0.7488             |                             |                      |
| CF1903                        | <i>glp-1</i>                                                                               | 117 / 124         | 80.71          | 1.62   | <0.0001            | <0.0001                     |                      |
| AGP54                         | <i>nhr-49;glp-1 glmEx11</i><br>[ <i>Pcol-12::nhr-49::GFP</i> +<br><i>Pmyo-2::mCherry</i> ] | 97 / 115          | 57.83          | 2.42   | 1                  | 1                           | <0.0001              |
| Trial 2#                      |                                                                                            |                   |                |        |                    |                             |                      |
| WT                            | Wildtype                                                                                   | 68/120            | 72.12          | 2.14   |                    |                             |                      |
| AGP22                         | <i>nhr-49;glp-1</i>                                                                        | 108/120           | 57.92          | 1.35   | <0.0001            |                             |                      |
| CF1903                        | <i>glp-1</i>                                                                               | 105/120           | 82.88          | 2.08   | 0.0042             | <0.0001                     |                      |
| AGP54                         | <i>nhr-49;glp-1 glmEx11</i><br>[ <i>Pcol-12::nhr-49::GFP</i> +<br><i>Pmyo-2::mCherry</i> ] | 96/120            | 56.06          | 2.53   | 0.0004             | 1                           | <0.0001              |
| Trial 3^                      |                                                                                            |                   |                |        |                    |                             |                      |
| WT                            | Wildtype                                                                                   | 67 / 114          | 75.62          | 1.71   |                    |                             |                      |
| AGP22                         | <i>nhr-49;glp-1</i>                                                                        | 98 / 111          | 53.32          | 1.26   | <0.0001            |                             |                      |
| CF1903                        | <i>glp-1</i>                                                                               | 104 / 108         | 89.65          | 2.83   | 0.0429             | <0.0001                     |                      |
| AGP54                         | <i>nhr-49;glp-1 glmEx11</i><br>[ <i>Pcol-12::nhr-49::GFP</i> +<br><i>Pmyo-2::mCherry</i> ] | 89 / 104          | 66.00          | 2.7    | 0.0508             | <0.0001                     | <0.0001              |
| Table S3e.2: SURVIVAL ON OP50 |                                                                                            |                   |                |        |                    |                             |                      |
| Strain                        | Background Genotype                                                                        | Trial 1@          |                |        | Bonferroni P-value |                             |                      |
|                               |                                                                                            | n = obs/<br>total | Mean<br>(days) | SE +/- | P (vs N2)          | P (vs <i>nhr-49;glp-1</i> ) | P (vs <i>glp-1</i> ) |
| AGP22                         | <i>nhr-49;glp-1</i>                                                                        | 72/72             | 11.27          | 0.26   |                    |                             |                      |
| CF1903                        | <i>glp-1</i>                                                                               | 65/77             | 25.78          | 0.98   |                    | <0.0001                     |                      |
| AGP54                         | <i>nhr-49;glp-1 glmEx11</i><br>[ <i>Pcol-12::nhr-49::GFP</i> +<br><i>Pmyo-2::mCherry</i> ] | 28/42             | 21.06          | 1.36   |                    | <0.0001                     | 0.0593               |
| Trial 2~                      |                                                                                            |                   |                |        |                    |                             |                      |
| AGP22                         | <i>nhr-49;glp-1</i>                                                                        | 125 / 142         | 9.96           | 0.07   |                    |                             |                      |
| CF1903                        | <i>glp-1</i>                                                                               | 100 / 107         | 18.49          | 0.53   |                    | <0.0001                     |                      |
| AGP54                         | <i>nhr-49;glp-1 glmEx11</i><br>[ <i>Pcol-12::nhr-49::GFP</i> +<br><i>Pmyo-2::mCherry</i> ] | 118 / 136         | 16.61          | 0.13   |                    | <0.0001                     | 0.0009               |

\*, #, ^, \$, & and ~ on different tabs/sub-sections of Table S3 denote trials performed at the same time  
Underlined Trials shown in Fig. 3

**Table S4a: Impact of endogenous promoter-driven NHR-49 expression on survival of *nhr-49* mutants on PA14 (a.1) and OP50 (a.2)**

| Table S4a.1: SURVIVAL ON PA14 |                                                           |                   |          |        |                    |                       |
|-------------------------------|-----------------------------------------------------------|-------------------|----------|--------|--------------------|-----------------------|
| Strain                        | Background/Genotype                                       | Trial 1*          |          |        | Bonferroni P-value |                       |
|                               |                                                           | n = obs/<br>total | Mean (h) | SE +/- | P (vs N2)          | P (vs <i>nhr-49</i> ) |
| WT                            | Wildtype                                                  | 125 / 155         | 67.25    | 1.86   |                    |                       |
| AGP12a                        | <i>nhr-49</i>                                             | 145 / 167         | 51.89    | 1.41   | <0.0001            |                       |
| AGP33                         | <i>nhr-49 glmEx5 [Pnhr-49::nhr-49::GFP + Pmyo-2::mCh]</i> | 115 / 131         | 46.68    | 2.12   | <0.0001            | 0.506                 |
| Trial 2#                      |                                                           |                   |          |        |                    |                       |
| WT                            | Wildtype                                                  | 93/150            | 68.58    | 2.05   |                    |                       |
| AGP12a                        | <i>nhr-49</i>                                             | 126/150           | 64.63    | 1.81   | 0.6022             |                       |
| AGP33                         | <i>nhr-49 glmEx5 [Pnhr-49::nhr-49::GFP + Pmyo-2::mCh]</i> | 87/100            | 74.96    | 3.35   | 0.7647             | 0.0101                |
| Trial 3^                      |                                                           |                   |          |        |                    |                       |
| WT                            | Wildtype                                                  | 63/125            | 78.24    | 2.57   |                    |                       |
| AGP12a                        | <i>nhr-49</i>                                             | 99/127            | 58       | 1.44   | <0.0001            |                       |
| AGP33                         | <i>nhr-49 glmEx5 [Pnhr-49::nhr-49::GFP + Pmyo-2::mCh]</i> | 87/127            | 94.98    | 3.08   | 0.002              | <0.0001               |
| Trial 4\$                     |                                                           |                   |          |        |                    |                       |
| WT                            | Wildtype                                                  | 55/90             | 84.82    | 2.63   |                    |                       |
| AGP12a                        | <i>nhr-49</i>                                             | 102/113           | 60.24    | 1.52   | 0.0001             |                       |
| AGP33                         | <i>nhr-49 glmEx5 [Pnhr-49::nhr-49::GFP + Pmyo-2::mCh]</i> | 100/125           | 84.35    | 2.17   | 1                  | 0.0001                |
| Table S4a.2: SURVIVAL ON OP50 |                                                           |                   |          |        |                    |                       |
| Strain                        | Background/Genotype                                       | Trial 1@          |          |        | Bonferroni P-value |                       |
|                               |                                                           | n = obs/<br>total | Mean (h) | SE +/- | P (vs N2)          | P (vs <i>nhr-49</i> ) |
| WT                            | Wildtype                                                  | 67/73             | 16.67    | 0.65   |                    |                       |
| AGP12a                        | <i>nhr-49</i>                                             | 33/77             | 14.39    | 0.69   | 0.1514             |                       |
| AGP33                         | <i>nhr-49 glmEx5 [Pnhr-49::nhr-49::GFP + Pmyo-2::mCh]</i> | 56/69             | 18.99    | 0.71   | 0.1646             | 0.0001                |
| Trial 2&                      |                                                           |                   |          |        |                    |                       |
| WT                            | Wildtype                                                  | 89 / 122          | 15.42    | 0.49   |                    |                       |
| AGP12a                        | <i>nhr-49</i>                                             | 110 / 119         | 12.5     | 0.36   | <0.0001            |                       |
| AGP33                         | <i>nhr-49 glmEx5 [Pnhr-49::nhr-49::GFP + Pmyo-2::mCh]</i> | 97 / 112          | 18       | 0.57   | 0.0424             | <0.0001               |

\*, #, ^, \$, & on different tabs/sub-sections of Table S4 denote trials performed at the same time  
Underlined Trials shown in Fig.4

**Table S4b: Impact of neuronal (*unc-119*) promoter-driven NHR-49 expression on survival of *nhr-49* mutants on PA14 (b.1) and OP50 (b.2)**

| Table S4b. 1: SURVIVAL ON PA14 |                                                                    |                   |          |        |                    |                          |
|--------------------------------|--------------------------------------------------------------------|-------------------|----------|--------|--------------------|--------------------------|
| Strain                         | Background/Genotype                                                | Trial 1*          |          |        | Bonferroni P-value |                          |
|                                |                                                                    | n = obs/<br>total | Mean (h) | SE +/- | P (vs N2)          | P (vs<br><i>nhr-49</i> ) |
| WT                             | Wildtype                                                           | 125 / 155         | 67.25    | 1.86   |                    |                          |
| AGP12a                         | <i>nhr-49</i>                                                      | 145 / 167         | 51.89    | 1.41   | <0.0001            |                          |
| AGP103a                        | <i>nhr-49 glmEx20 [Punc-119::<i>nhr-49::GFP + Pmyo-2::mCh</i>]</i> | 113 / 124         | 57.87    | 2.82   | 0.9996             | 0.0017                   |
| Trial 2#                       |                                                                    |                   |          |        |                    |                          |
| WT                             | Wildtype                                                           | 93/150            | 68.58    | 2.05   |                    |                          |
| AGP12a                         | <i>nhr-49</i>                                                      | 126/150           | 64.63    | 1.81   | 0.6022             |                          |
| AGP103a                        | <i>nhr-49 glmEx20 [Punc-119::<i>nhr-49::GFP + Pmyo-2::mCh</i>]</i> | 86/130            | 77.42    | 3.34   | <0.0001            | 0.0002                   |
| Trial 3^                       |                                                                    |                   |          |        |                    |                          |
| WT                             | Wildtype                                                           | 63/125            | 78.24    | 2.57   |                    |                          |
| AGP12a                         | <i>nhr-49</i>                                                      | 99/127            | 58       | 1.44   | <0.0001            |                          |
| AGP103a                        | <i>nhr-49 glmEx20 [Punc-119::<i>nhr-49::GFP + Pmyo-2::mCh</i>]</i> | 96/125            | 81.54    | 3.19   | 0.7738             | <0.0001                  |
| Trial 4\$                      |                                                                    |                   |          |        |                    |                          |
| WT                             | Wildtype                                                           | 55/90             | 84.82    | 2.63   |                    |                          |
| AGP12a                         | <i>nhr-49</i>                                                      | 102/113           | 60.24    | 1.52   | 0.0001             |                          |
| AGP103a                        | <i>nhr-49 glmEx20 [Punc-119::<i>nhr-49::GFP + Pmyo-2::mCh</i>]</i> | 95/110            | 84.44    | 2.73   | 1                  | 0.0001                   |
| Table S4b.2: SURVIVAL ON OP50  |                                                                    |                   |          |        |                    |                          |
| Strain                         | Background/Genotype                                                | Trial 1@          |          |        | Bonferroni P-value |                          |
|                                |                                                                    | n = obs/<br>total | Mean (h) | SE +/- | P (vs N2)          | P (vs<br><i>nhr-49</i> ) |
| WT                             | Wildtype                                                           | 67/73             | 16.67    | 0.65   |                    |                          |
| AGP12a                         | <i>nhr-49</i>                                                      | 33/77             | 14.39    | 0.69   | 0.1514             |                          |
| AGP103a                        | <i>nhr-49 glmEx20 [Punc-119::<i>nhr-49::GFP + Pmyo-2::mCh</i>]</i> | 48/57             | 14.58    | 0.63   | 0.1326             | 1                        |
| Trial 2                        |                                                                    |                   |          |        |                    |                          |
| WT                             | Wildtype                                                           | 74 / 91           | 24.2     | 0.55   |                    |                          |
| AGP12a                         | <i>nhr-49</i>                                                      | 70 / 75           | 14.29    | 0.22   | <0.0001            |                          |
| AGP103a                        | <i>nhr-49 glmEx20 [Punc-119::<i>nhr-49::GFP + Pmyo-2::mCh</i>]</i> | 87 / 95           | 13.98    | 0.2    | <0.0001            | 1                        |
| Trial 3                        |                                                                    |                   |          |        |                    |                          |
| WT                             | Wildtype                                                           | 71 / 100          | 23.8     | 0.58   |                    |                          |
| AGP12a                         | <i>nhr-49</i>                                                      | 41 / 72           | 9.23     | 0.31   | <0.0001            |                          |
| AGP103a                        | <i>nhr-49 glmEx20 [Punc-119::<i>nhr-49::GFP + Pmyo-2::mCh</i>]</i> | 73 / 91           | 15.37    | 0.57   | <0.0001            | <0.0001                  |
| Trial 4                        |                                                                    |                   |          |        |                    |                          |
| WT                             | Wildtype                                                           | 71 / 82           | 17.99    | 0.58   |                    |                          |
| AGP12a                         | <i>nhr-49</i>                                                      | 63 / 65           | 11.11    | 0.33   | <0.0001            |                          |
| AGP103a                        | <i>nhr-49 glmEx20 [Punc-119::<i>nhr-49::GFP + Pmyo-2::mCh</i>]</i> | 33 / 76           | 22.23    | 0.71   | 0.0006             | 0.0002                   |

\*, #, ^, \$, & on different tabs/sub-sections of Table S4 denote trials performed at the same time  
Underlined Trials shown in Fig.4



**Table S4c: Impact of intestinal (*gly-19*) promoter-driven NHR-49 expression on survival of *nhr-49* mutants on PA14 (c.1) and OP50 (c.2)**

| <b>Table S4c. 1: SURVIVAL ON PA14</b>            |                                                                 |                           |                 |               |                           |                                 |
|--------------------------------------------------|-----------------------------------------------------------------|---------------------------|-----------------|---------------|---------------------------|---------------------------------|
| <b>Strain</b>                                    | <b>Background/Genotype</b>                                      | <b>Trial 1*</b>           |                 |               | <b>Bonferroni P-value</b> |                                 |
|                                                  |                                                                 | <b>n = obs/<br/>total</b> | <b>Mean (h)</b> | <b>SE +/-</b> | <b>P (vs N2)</b>          | <b>P (vs<br/><i>nhr-49</i>)</b> |
| WT                                               | Wildtype                                                        | 125 / 155                 | 67.25           | 1.86          |                           |                                 |
| AGP12a                                           | <i>nhr-49</i>                                                   | 145 / 167                 | 51.89           | 1.41          | <0.0001                   |                                 |
| AGP65                                            | <i>nhr-49 glmEx9 [Pgly-19:: nhr-49<br/>::GFP + Pmyo-2::mCh]</i> | 107 / 132                 | 50.82           | 2.14          | <0.0001                   | 1                               |
| <b>Trial 2#</b>                                  |                                                                 |                           |                 |               |                           |                                 |
| WT                                               | Wildtype                                                        | 93/150                    | 68.58           | 2.05          |                           |                                 |
| AGP12a                                           | <i>nhr-49</i>                                                   | 126/150                   | 64.63           | 1.81          | 0.6022                    |                                 |
| AGP65                                            | <i>nhr-49 glmEx9 [Pgly-19:: nhr-49<br/>::GFP + Pmyo-2::mCh]</i> | 89/150                    | 73.78           | 2.92          | 1                         | 0.0201                          |
| <b>Trial 3^</b>                                  |                                                                 |                           |                 |               |                           |                                 |
| WT                                               | Wildtype                                                        | 63/125                    | 78.24           | 2.57          |                           |                                 |
| AGP12a                                           | <i>nhr-49</i>                                                   | 99/127                    | 58              | 1.44          | <0.0001                   |                                 |
| AGP65                                            | <i>nhr-49 glmEx9 [Pgly-19:: nhr-49<br/>::GFP + Pmyo-2::mCh]</i> | 87/125                    | 77.6            | 2.73          | 1                         | <0.0001                         |
| <b>Trial 4\$</b>                                 |                                                                 |                           |                 |               |                           |                                 |
| WT                                               | Wildtype                                                        | 55/90                     | 84.82           | 2.63          |                           |                                 |
| AGP12a                                           | <i>nhr-49</i>                                                   | 102/113                   | 60.24           | 1.52          | 0.0001                    |                                 |
| AGP65                                            | <i>nhr-49 glmEx9 [Pgly-19:: nhr-49<br/>::GFP + Pmyo-2::mCh]</i> | 100/116                   | 75.5            | 2.37          | 0.2823                    | 0.0001                          |
| <b>Table S4c.2: Survival on SURVIVAL ON OP50</b> |                                                                 |                           |                 |               |                           |                                 |
| <b>Strain</b>                                    | <b>Background/Genotype</b>                                      | <b>Trial 1@</b>           |                 |               | <b>Bonferroni P-value</b> |                                 |
|                                                  |                                                                 | <b>n = obs/<br/>total</b> | <b>Mean (h)</b> | <b>SE +/-</b> | <b>P (vs N2)</b>          | <b>P (vs<br/><i>nhr-49</i>)</b> |
| WT                                               | Wildtype                                                        | 67/73                     | 16.67           | 0.65          |                           |                                 |
| AGP12a                                           | <i>nhr-49</i>                                                   | 33/77                     | 14.39           | 0.69          | 0.1514                    |                                 |
| AGP65                                            | <i>nhr-49 glmEx9 [Pgly-19:: nhr-49<br/>::GFP + Pmyo-2::mCh]</i> | 47/56                     | 15.85           | 0.71          | 1                         | 1                               |
| <b>Trial 2&amp;</b>                              |                                                                 |                           |                 |               |                           |                                 |
| WT                                               | Wildtype                                                        | 89 / 122                  | 15.42           | 0.49          |                           |                                 |
| AGP12a                                           | <i>nhr-49</i>                                                   | 110 / 119                 | 12.5            | 0.36          | <0.0001                   |                                 |
| AGP65                                            | <i>nhr-49 glmEx9 [Pgly-19:: nhr-49<br/>::GFP + Pmyo-2::mCh]</i> | 97 / 118                  | 15.25           | 0.4           | 1                         | <0.0001                         |

\*, #, ^, \$, & on different tabs/sub-sections of Table S4 denote trials performed at the same time  
Underlined Trials shown in Fig.4

**Table S4d: Impact of muscle (*myo-3*) promoter-driven NHR-49 expression on survival of *nhr-49* mutants on PA14 (d.1) and OP50 (d.2)**

| Table S4d. 1: SURVIVAL ON PA14 |                                                                         |                   |          |        |                    |                          |
|--------------------------------|-------------------------------------------------------------------------|-------------------|----------|--------|--------------------|--------------------------|
| Strain                         | Background/Genotype                                                     | Trial 1*          |          |        | Bonferroni P-value |                          |
|                                |                                                                         | n = obs/<br>total | Mean (h) | SE +/- | P (vs N2)          | P (vs<br><i>nhr-49</i> ) |
| WT                             | Wildtype                                                                | 125 / 155         | 67.25    | 1.86   |                    |                          |
| AGP12a                         | <i>nhr-49</i>                                                           | 145 / 167         | 51.89    | 1.41   | <0.0001            |                          |
| AGP63                          | <i>nhr-49 glmEx8 [Pmyo-3::<i>nhr-49</i> ::GFP + Pmyo-2::<i>mCh</i>]</i> | 137 / 153         | 44.92    | 1.55   | <0.0001            | 0.0819                   |
| Trial 2#                       |                                                                         |                   |          |        |                    |                          |
| WT                             | Wildtype                                                                | 93/150            | 68.58    | 2.05   |                    |                          |
| AGP12a                         | <i>nhr-49</i>                                                           | 126/150           | 64.63    | 1.81   | 0.6022             |                          |
| AGP63                          | <i>nhr-49 glmEx8 [Pmyo-3::<i>nhr-49</i> ::GFP + Pmyo-2::<i>mCh</i>]</i> | 115/150           | 65.11    | 1.73   | 1                  | 1                        |
| Trial 3^                       |                                                                         |                   |          |        |                    |                          |
| WT                             | Wildtype                                                                | 63/125            | 78.24    | 2.57   |                    |                          |
| AGP12a                         | <i>nhr-49</i>                                                           | 99/127            | 58       | 1.44   | <0.0001            |                          |
| AGP63                          | <i>nhr-49 glmEx8 [Pmyo-3::<i>nhr-49</i> ::GFP + Pmyo-2::<i>mCh</i>]</i> | 91/126            | 68.06    | 1.59   | 0.0124             | <0.0001                  |
| Trial 4\$                      |                                                                         |                   |          |        |                    |                          |
| WT                             | Wildtype                                                                | 55/90             | 84.82    | 2.63   |                    |                          |
| AGP12a                         | <i>nhr-49</i>                                                           | 102/113           | 60.24    | 1.52   | 0.0001             |                          |
| AGP63                          | <i>nhr-49 glmEx8 [Pmyo-3::<i>nhr-49</i> ::GFP + Pmyo-2::<i>mCh</i>]</i> | 105/119           | 65.73    | 1.27   | 0.0001             | 0.0991                   |
| Table S4d.2: SURVIVAL ON OP50  |                                                                         |                   |          |        |                    |                          |
| Strain                         | Background/Genotype                                                     | Trial 1@          |          |        | Bonferroni P-value |                          |
|                                |                                                                         | n = obs/<br>total | Mean (h) | SE +/- | P (vs N2)          | P (vs<br><i>nhr-49</i> ) |
| WT                             | Wildtype                                                                | 67/73             | 16.67    | 0.65   |                    |                          |
| AGP12a                         | <i>nhr-49</i>                                                           | 33/77             | 14.39    | 0.69   | 0.1514             |                          |
| AGP63                          | <i>nhr-49 glmEx8 [Pmyo-3::<i>nhr-49</i> ::GFP + Pmyo-2::<i>mCh</i>]</i> | 73/75             | 11.84    | 0.54   | 0.0001             | 0.0893                   |
| Trial 2&                       |                                                                         |                   |          |        |                    |                          |
| WT                             | Wildtype                                                                | 89 / 122          | 15.42    | 0.49   |                    |                          |
| AGP12a                         | <i>nhr-49</i>                                                           | 110 / 119         | 12.5     | 0.36   | <0.0001            |                          |
| AGP63                          | <i>nhr-49 glmEx8 [Pmyo-3::<i>nhr-49</i> ::GFP + Pmyo-2::<i>mCh</i>]</i> | 75 / 80           | 12.01    | 0.71   | 0.0001             | 1                        |

\*, #, ^, \$, & on different tabs/sub-sections of Table S4 denote trials performed at the same time  
Underlined Trials shown in Fig.4

**Table S4e: Impact of hypodermal (*col-12*) promoter-driven NHR-49 expression on survival of *nhr-49* mutants on PA14 (e.1) and OP50 (e.2)**

| Table S4e. 1: SURVIVAL ON PA14 |                                                            |                   |          |        |                    |                       |
|--------------------------------|------------------------------------------------------------|-------------------|----------|--------|--------------------|-----------------------|
| Strain                         | Background/Genotype                                        | Trial 1*          |          |        | Bonferroni P-value |                       |
|                                |                                                            | n = obs/<br>total | Mean (h) | SE +/- | P (vs N2)          | P (vs <i>nhr-49</i> ) |
| WT                             | Wildtype                                                   | 125 / 155         | 67.25    | 1.86   |                    |                       |
| AGP12a                         | <i>nhr-49</i>                                              | 145 / 167         | 51.89    | 1.41   | <0.0001            |                       |
| AGP53                          | <i>nhr-49 glmEx11 [Pcol-12::nhr-49::GFP + Pmyo-2::mCh]</i> | 138 / 150         | 30.21    | 1.77   | <0.0001            | <0.0001               |
| Trial 2#                       |                                                            |                   |          |        |                    |                       |
| WT                             | Wildtype                                                   | 93/150            | 68.58    | 2.05   |                    |                       |
| AGP12a                         | <i>nhr-49</i>                                              | 126/150           | 64.63    | 1.81   | 0.6022             |                       |
| AGP63                          | <i>nhr-49 glmEx8 [Pmyo-3::nhr-49::GFP + Pmyo-2::mCh]</i>   | 90/128            | 48.55    | 2.56   | <0.0001            | 0.0001                |
| Trial 3^                       |                                                            |                   |          |        |                    |                       |
| WT                             | Wildtype                                                   | 63/125            | 78.24    | 2.57   |                    |                       |
| AGP12a                         | <i>nhr-49</i>                                              | 99/127            | 58       | 1.44   | <0.0001            |                       |
| AGP53                          | <i>nhr-49 glmEx11 [Pcol-12::nhr-49::GFP + Pmyo-2::mCh]</i> | 79/100            | 46.27    | 2.72   | <0.0001            | 0.0415                |
| Trial 4\$                      |                                                            |                   |          |        |                    |                       |
| WT                             | Wildtype                                                   | 55/90             | 84.82    | 2.63   |                    |                       |
| AGP12a                         | <i>nhr-49</i>                                              | 102/113           | 60.24    | 1.52   | 0.0001             |                       |
| AGP53                          | <i>nhr-49 glmEx11 [Pcol-12::nhr-49::GFP + Pmyo-2::mCh]</i> | 28/32             | 48.62    | 4.65   | 0.0001             | 0.146                 |
| Table S4e.2: SURVIVAL ON OP50  |                                                            |                   |          |        |                    |                       |
| Strain                         | Background/Genotype                                        | Trial 1@          |          |        | Bonferroni P-value |                       |
|                                |                                                            | n = obs/<br>total | Mean (h) | SE +/- | P (vs N2)          | P (vs <i>nhr-49</i> ) |
| WT                             | Wildtype                                                   | 67/73             | 16.67    | 0.65   |                    |                       |
| AGP12a                         | <i>nhr-49</i>                                              | 33/77             | 14.39    | 0.69   | 0.1514             |                       |
| AGP53                          | <i>nhr-49 glmEx11 [Pcol-12::nhr-49::GFP + Pmyo-2::mCh]</i> | 59/70             | 16.89    | 0.65   | 1                  | 0.0926                |
| Trial 2&                       |                                                            |                   |          |        |                    |                       |
| WT                             | Wildtype                                                   | 89 / 122          | 15.42    | 0.49   |                    |                       |
| AGP12a                         | <i>nhr-49</i>                                              | 110 / 119         | 12.5     | 0.36   | <0.0001            |                       |
| AGP53                          | <i>nhr-49 glmEx11 [Pcol-12::nhr-49::GFP + Pmyo-2::mCh]</i> | 131 / 141         | 14.86    | 0.45   | 1                  | <0.0001               |

\*, #, ^, \$, & on different tabs/sub-sections of Table S4 denote trials performed at the same time  
Underlined Trials shown in Fig.4

**Table S5a: Impact of endogenous promoter-driven NHR-49 overexpression on survival of wild-type *C. elegans* on PA14 (a.1) and OP50 (a.2)**

| <b>Table S5a. 1: SURVIVAL ON PA14</b> |                                                    |               |          |        |                            |                          |
|---------------------------------------|----------------------------------------------------|---------------|----------|--------|----------------------------|--------------------------|
| Strain                                | Background/Genotype                                | Trial 1*      |          |        | Bonferroni P-value         | Non-Bonferroni P-value   |
|                                       |                                                    | n = obs/total | Mean (h) | SE +/- |                            |                          |
| WT                                    | Wild type                                          | 126 / 145     | 54.32    | 1.09   |                            |                          |
| AGP24f                                | <i>glmEx5 [Pnhr-49::nhr-49::GFP + Pmyo-2::mCh]</i> | 123 / 153     | 68.14    | 1.7    | <0.0001                    | <0.0001                  |
| <b>Trial 2#</b>                       |                                                    |               |          |        |                            |                          |
| WT                                    | Wild type                                          | 60 / 117      | 78.4     | 2.66   |                            |                          |
| AGP24f                                | <i>glmEx5 [Pnhr-49::nhr-49::GFP + Pmyo-2::mCh]</i> | 61 / 110      | 71.05    | 3.78   | 0.229                      | 0.0286                   |
| <b>Trial 3^</b>                       |                                                    |               |          |        |                            |                          |
| WT                                    | Wild type                                          | 102 / 129     | 76.98    | 2.25   |                            |                          |
| AGP24f                                | <i>glmEx5 [Pnhr-49::nhr-49::GFP + Pmyo-2::mCh]</i> | 75 / 121      | 76.89    | 3.06   | 1                          | 0.895                    |
| <b>Table S5a.2: SURVIVAL ON OP50</b>  |                                                    |               |          |        |                            |                          |
| Strain                                | Background/Genotype                                | Trial 1@      |          |        | Bonferroni P-value (vs N2) | Non-Bonferroni P (vs N2) |
|                                       |                                                    | n = obs/total | Mean (h) | SE +/- |                            |                          |
| WT                                    | Wild type                                          | 67 / 73       | 16.67    | 0.65   |                            |                          |
| AGP12a                                | <i>nhr-49</i>                                      | 33 / 77       | 14.39    | 0.69   | 0.1514                     |                          |
| AGP24f                                | <i>glmEx5 [Pnhr-49::nhr-49::GFP + Pmyo-2::mCh]</i> | 35 / 44       | 20.83    | 1.01   | 0.0109                     | 0.0016                   |
| <b>Trial 2~</b>                       |                                                    |               |          |        |                            |                          |
| WT                                    | Wild type                                          | 73 / 121      | 17.81    | 0.56   |                            |                          |
| AGP12a                                | <i>nhr-49</i>                                      | 69 / 76       | 14.6     | 0.54   | 0.0003                     |                          |
| AGP24f                                | <i>glmEx5 [Pnhr-49::nhr-49::GFP + Pmyo-2::mCh]</i> | 70 / 115      | 17.58    | 0.75   | 1                          | 0.603                    |

\*, #, ^, &, @, ~ on different tabs/sub-sections of Table S5 denote trials performed at the same time  
Underlined Trials shown in Fig. 5

**Table S5b: Impact of neuronal (*unc-119*) promoter-driven NHR-49 overexpression on survival of wild-type *C. elegans* on PA14 (b.1) and OP50 (b.2)**

**Table S5B. 1: SURVIVAL ON PA14**

| Strain   | Background/Genotype                                  | Trial 1*       |          |        | Bonferroni P-value | Non-Bonferroni P-value |
|----------|------------------------------------------------------|----------------|----------|--------|--------------------|------------------------|
|          |                                                      | n = obs/ total | Mean (h) | SE +/- |                    |                        |
| WT       | Wild type                                            | 126 / 145      | 54.32    | 1.09   |                    |                        |
| AGP102   | <i>glmEx20 [Pnhr-49::unc-119::GFP + Pmyo-2::mCh]</i> | 114 / 136      | 73.72    | 1.61   | <0.0001            | <0.0001                |
| Trial 2# |                                                      |                |          |        |                    |                        |
| WT       | Wild type                                            | 60 / 117       | 78.4     | 2.66   |                    |                        |
| AGP102   | <i>glmEx20 [Pnhr-49::unc-119::GFP + Pmyo-2::mCh]</i> | 88/120         | 70.79    | 2.11   | 0.093              | 0.0116                 |
| Trial 3^ |                                                      |                |          |        |                    |                        |
| WT       | Wild type                                            | 102 / 129      | 76.98    | 2.25   |                    |                        |
| AGP102   | <i>glmEx20 [Pnhr-49::unc-119::GFP + Pmyo-2::mCh]</i> | 96/127         | 86.37    | 2.44   | 0.0333             | 0.0135                 |

**Table S5B.2: SURVIVAL ON OP50**

| Strain  | Background/Genotype                                  | Trial 1@       |          |        | Bonferroni P-value | Non-Bonferroni P-value |
|---------|------------------------------------------------------|----------------|----------|--------|--------------------|------------------------|
|         |                                                      | n = obs/ total | Mean (h) | SE +/- |                    |                        |
| WT      | Wild type                                            | 67 / 73        | 16.67    | 0.65   |                    |                        |
| AGP102  | <i>glmEx20 [Pnhr-49::unc-119::GFP + Pmyo-2::mCh]</i> | 39/57          | 19.31    | 0.75   | 0.0651             | 0.0093                 |
| Trial 2 |                                                      |                |          |        |                    |                        |
| WT      | Wild type                                            | 74 / 91        | 24.2     | 0.55   |                    |                        |
| AGP102  | <i>glmEx20 [Pnhr-49::unc-119::GFP + Pmyo-2::mCh]</i> | 57 / 94        | 22.35    | 0.6    | 0.4163             | 0.0416                 |
| Trial 3 |                                                      |                |          |        |                    |                        |
| WT      | Wild type                                            | 71 / 100       | 23.8     | 0.58   |                    |                        |
| AGP102  | <i>glmEx20 [Pnhr-49::unc-119::GFP + Pmyo-2::mCh]</i> | 40 / 71        | 21.53    | 0.81   | 0.074              | 0.0092                 |
| Trial 4 |                                                      |                |          |        |                    |                        |
| WT      | Wildtype                                             | 71 / 82        | 17.99    | 0.58   |                    |                        |
| AGP102  | <i>glmEx20 [Pnhr-49::unc-119::GFP + Pmyo-2::mCh]</i> | 32 / 70        | 23.23    | 0.97   | <0.0001            | <0.0001                |

\*, #, ^, &, @, ~ on different tabs/sub-sections of Table S5 denote trials performed at the same time  
Underlined Trials shown in Fig. 5

**Table S5c: Impact of Intestinal (*gly-19*) promoter-driven NHR-49 overexpression on survival of wild-type *C. elegans* on PA14 (c.1) or OP50 (c.2)**

**Table S5c. 1: SURVIVAL ON PA14**

| Strain   | Background/Genotype                                                  | Trial 1*      |          |        | Bonferroni P-value | Non-Bonferroni P-value |
|----------|----------------------------------------------------------------------|---------------|----------|--------|--------------------|------------------------|
|          |                                                                      | n = obs/total | Mean (h) | SE +/- |                    |                        |
| WT       | Wild type                                                            | 126 / 145     | 54.32    | 1.09   |                    |                        |
| AGP40    | <i>glmEx9 [Pgly-19::<i>nhr-49</i>::GFP + Pmyo-2::<i>mCherry]</i></i> | 117 / 131     | 73.6     | 1.83   | <0.0001            | <0.0001                |
| Trial 2# |                                                                      |               |          |        |                    |                        |
| WT       | Wild type                                                            | 60/117        | 78.4     | 2.66   |                    |                        |
| AGP40    | <i>glmEx9 [Pgly-19::<i>nhr-49</i>::GFP + Pmyo-2::<i>mCherry]</i></i> | 92/128        | 94.83    | 2.72   | 0.0007             | 0.0001                 |
| Trial 3^ |                                                                      |               |          |        |                    |                        |
| WT       | Wildtype                                                             | 102/129       | 76.98    | 2.25   |                    |                        |
| AGP40    | <i>glmEx9 [Pgly-19::<i>nhr-49</i>::GFP + Pmyo-2::<i>mCherry]</i></i> | 96/124        | 91.97    | 2.65   | 0.0002             | 0.0001                 |

**Table S5c.2: SURVIVAL ON OP50**

| Strain   | Background Genotype                                                  | Trial 1@      |             |        | Bonferroni P-value (vs N2) | Non-Bonferroni P (vs N2) |
|----------|----------------------------------------------------------------------|---------------|-------------|--------|----------------------------|--------------------------|
|          |                                                                      | n = obs/total | Mean (days) | SE +/- |                            |                          |
| WT       | Wild type                                                            | 67/73         | 16.67       | 0.65   |                            |                          |
| AGP12a   | <i>nhr-49</i>                                                        | 33/77         | 14.39       | 0.69   | 0.1514                     |                          |
| AGP40    | <i>glmEx9 [Pgly-19::<i>nhr-49</i>::GFP + Pmyo-2::<i>mCherry]</i></i> | 64/67         | 18.49       | 0.82   | 0.6491                     | 0.0927                   |
| Trial 2~ |                                                                      |               |             |        |                            |                          |
| WT       | Wild type                                                            | 73 / 121      | 17.81       | 0.56   |                            |                          |
| AGP12a   | <i>nhr-49</i>                                                        | 69 / 76       | 14.6        | 0.54   | 0.0003                     |                          |
| AGP40    | <i>glmEx9 [Pgly-19::<i>nhr-49</i>::GFP + Pmyo-2::<i>mCherry]</i></i> | 86 / 116      | 19.06       | 0.4    | 1                          | 0.202                    |

\*, #, ^, &, @, ~ on different tabs/sub-sections of Table S5 denote trials performed at the same time  
Underlined Trials shown in Fig. 5

**Table S5d: Impact of muscle (*myo-3*) promoter-driven NHR-49 overexpression on survival of wild-type *C. elegans* on PA14 (d.1) or OP50 (d.2)**

| Table S5d. 1: SURVIVAL ON PA14 |                                                        |                |             |        |                            |                          |
|--------------------------------|--------------------------------------------------------|----------------|-------------|--------|----------------------------|--------------------------|
| Strain                         | Background/Genotype                                    | Trial 1*       |             |        | Bonferroni P-value         | Non-Bonferroni P-value   |
|                                |                                                        | n = obs/ total | Mean (h)    | SE +/- |                            |                          |
| WT                             | Wild type                                              | 126 / 145      | 54.32       | 1.09   |                            |                          |
| AGP27                          | <i>glmEx9 [Pmyo-3::nhr-49 ::GFP + Pmyo-2::mCherry]</i> | 106 / 126      | 61.12       | 2.11   | 0.0007                     | 0.0001                   |
| Trial 2#                       |                                                        |                |             |        |                            |                          |
| WT                             | Wild type                                              | 60/117         | 78.4        | 2.66   |                            |                          |
| AGP27                          | <i>glmEx9 [Pmyo-3::nhr-49 ::GFP + Pmyo-2::mCherry]</i> | 61/100         | 72.85       | 4.25   | 1                          | 0.289                    |
| Trial 3^                       |                                                        |                |             |        |                            |                          |
| WT                             | Wild type                                              | 102/129        | 76.98       | 2.25   |                            |                          |
| AGP27                          | <i>glmEx9 [Pmyo-3::nhr-49 ::GFP + Pmyo-2::mCherry]</i> | 66/100         | 72.11       | 4.28   | 1                          | 0.363                    |
| Table S5d.2: SURVIVAL ON OP50  |                                                        |                |             |        |                            |                          |
| Strain                         | Background Genotype                                    | Trial 1@       |             |        | Bonferroni P-value (vs N2) | Non-Bonferroni P (vs N2) |
|                                |                                                        | n = obs/ total | Mean (days) | SE +/- |                            |                          |
| WT                             | Wild type                                              | 67/73          | 16.67       | 0.65   |                            |                          |
| AGP12a                         | <i>nhr-49</i>                                          | 33/77          | 14.39       | 0.69   | 0.1514                     |                          |
| AGP27                          | <i>glmEx9 [Pmyo-3::nhr-49 ::GFP + Pmyo-2::mCherry]</i> | 39/52          | 14.6        | 0.55   | 0.5331                     | 0.0762                   |
| Trial 2~                       |                                                        |                |             |        |                            |                          |
| WT                             | Wild type                                              | 73 / 121       | 17.81       | 0.56   |                            |                          |
| AGP12a                         | <i>nhr-49</i>                                          | 69 / 76        | 14.6        | 0.54   | 0.0003                     |                          |
| AGP27                          | <i>glmEx9 [Pmyo-3::nhr-49 ::GFP + Pmyo-2::mCherry]</i> | 84 / 109       | 19.89       | 0.68   | 0.0389                     | 0.0065                   |

\*, #, ^, &, @, ~ on different tabs/sub-sections of Table S5 denote trials performed at the same time  
Underlined Trials shown in Fig. 5

**Table S5e: Impact of hypodermal (*col-12*) promoter-driven NHR-49 overexpression on survival of wild-type *C. elegans* on PA14 (e.1) or OP50 (e.2)**

| Table S5e. 1: SURVIVAL ON PA14 |                                                         |                |             |        |                            |                          |
|--------------------------------|---------------------------------------------------------|----------------|-------------|--------|----------------------------|--------------------------|
| Strain                         | Background/Genotype                                     | Trial 1*       |             |        | Bonferroni P-value         | Non-Bonferroni P-value   |
|                                |                                                         | n = obs/ total | Mean (h)    | SE +/- |                            |                          |
| WT                             | Wild type                                               | 126 / 145      | 54.32       | 1.09   |                            |                          |
| AGP45                          | <i>glmEx11 [Pcol-12::nhr-49::GFP + Pmyo-2::mCherry]</i> | 117 / 137      | 77.16       | 1.44   | <0.0001                    | <0.0001                  |
| Trial 2#                       |                                                         |                |             |        |                            |                          |
| WT                             | Wild type                                               | 60/117         | 78.4        | 2.66   |                            |                          |
| AGP45                          | <i>glmEx11 [Pcol-12::nhr-49::GFP + Pmyo-2::mCherry]</i> | 77/125         | 85.91       | 3.67   | 1                          | 0.326                    |
| Trial 3^                       |                                                         |                |             |        |                            |                          |
| WT                             | Wildtype                                                | 102/129        | 76.98       | 2.25   |                            |                          |
| AGP45                          | <i>glmEx11 [Pcol-12::nhr-49::GFP + Pmyo-2::mCherry]</i> | 63/97          | 82.68       | 2.65   | 0.3504                     | 0.013                    |
| Table S5e.2: SURVIVAL ON OP50  |                                                         |                |             |        |                            |                          |
| Strain                         | Background Genotype                                     | Trial 1@       |             |        | Bonferroni P-value (vs N2) | Non-Bonferroni P (vs N2) |
|                                |                                                         | n = obs/ total | Mean (days) | SE +/- |                            |                          |
| WT                             | Wild type                                               | 67/73          | 16.67       | 0.65   |                            |                          |
| AGP12a                         | <i>nhr-49</i>                                           | 33/77          | 14.39       | 0.69   | 0.1514                     |                          |
| AGP45                          | <i>glmEx11 [Pcol-12::nhr-49::GFP + Pmyo-2::mCherry]</i> | 57/66          | 17.27       | 0.67   | 1                          | 0.4482                   |
| Trial 2~                       |                                                         |                |             |        |                            |                          |
| WT                             | Wild type                                               | 73 / 121       | 17.81       | 0.56   |                            |                          |
| AGP12a                         | <i>nhr-49</i>                                           | 69 / 76        | 14.6        | 0.54   | 0.0003                     |                          |
| AGP45                          | <i>glmEx11 [Pcol-12::nhr-49::GFP + Pmyo-2::mCherry]</i> | 95 / 120       | 18.3        | 0.53   | 1                          | 0.468                    |

\*, #, ^, &, @, ~ on different tabs/sub-sections of Table S5 denote trials performed at the same time

Underlined Trials shown in Fig. 5



**Table S6a: Impact of tissue-specific expression of *nhr-49(et7)* on survival on PA14 (a.1) and lifespan on OP50 (a.2)**

| Table S6a.1: SURVIVAL ON PA14 |                                                              |                |          |        |                    |                       |
|-------------------------------|--------------------------------------------------------------|----------------|----------|--------|--------------------|-----------------------|
| Tissue of Expression          | Background / Genotype                                        | Trial 1#       |          |        | Bonferroni P-value |                       |
|                               |                                                              | n = obs/ total | Mean (h) | SE +/- | P (vs N2)          | P (vs <i>nhr-49</i> ) |
|                               | Wildtype                                                     | 87 / 150       | 77.36    | 1.79   |                    |                       |
|                               | <i>nhr-49(nr2041) lof</i>                                    | 116 / 150      | 62.34    | 1.07   | <0.0001            |                       |
| Neurons                       | <i>Punc-119::nhr-49(et7)::GFP + Pmyo-2::mCherry</i>          | 68 / 125       | 67.18    | 1.46   | 0.0003             | 0.026                 |
| Hypodermis                    | <i>Pcol-12::nhr-49(et7)::GFP + Pmyo-2::mCherry</i>           | 73 / 125       | 74.5     | 2.4    | 1                  | <0.0001               |
| Neurons                       | <i>nhr-49;[Punc-119::nhr-49(et7)::GFP + Pmyo-2::mCherry]</i> | 72 / 115       | 63.45    | 1.57   | <0.0001            | 1                     |
| Trial 2~                      |                                                              |                |          |        |                    |                       |
|                               | Wildtype                                                     | 94 / 120       | 75.16    | 2.74   |                    |                       |
|                               | <i>nhr-49(nr2041) lof</i>                                    | 117 / 130      | 53.73    | 1.54   | <0.0001            |                       |
| Neurons                       | <i>Punc-119::nhr-49(et7)::GFP + Pmyo-2::mCherry</i>          | 98 / 125       | 62.92    | 1.59   | 0.0017             | 0.0037                |
| Hypodermis                    | <i>Pcol-12::nhr-49(et7)::GFP + Pmyo-2::mCherry</i>           | 118 / 145      | 55.46    | 2.11   | <0.0001            | 1                     |
| Neurons                       | <i>nhr-49;[Punc-119::nhr-49(et7)::GFP + Pmyo-2::mCherry]</i> | 123 / 136      | 58.22    | 1.12   | <0.0001            | 0.59                  |
| Trial 3\$                     |                                                              |                |          |        |                    |                       |
|                               | Wildtype                                                     | 78 / 106       | 67.46    | 2.15   |                    |                       |
|                               | <i>nhr-49(nr2041) lof</i>                                    | 94 / 105       | 52.23    | 1.69   | > 0.0001           |                       |
| Neurons                       | <i>Punc-119::nhr-49(et7)::GFP + Pmyo-2::mCherry</i>          | 73 / 107       | 57.15    | 1.71   | 0.0002             | 0.0197                |
| Hypodermis                    | <i>Pcol-12::nhr-49(et7)::GFP + Pmyo-2::mCherry</i>           | 69 / 105       | 60.24    | 2.22   | 0.0647             | 0.0013                |
| Neurons                       | <i>nhr-49;[Punc-119::nhr-49(et7)::GFP + Pmyo-2::mCherry]</i> | 89 / 111       | 61.77    | 1.71   | 0.0316             | > 0.0001              |
| Table S6a.2: SURVIVAL ON OP50 |                                                              |                |          |        |                    |                       |
| Tissue of Expression          | Background / Genotype                                        | Trial 1◇       |          |        | Bonferroni P-value |                       |
|                               |                                                              | n = obs/ total | Mean (h) | SE +/- | P (vs N2)          | P (vs <i>nhr-49</i> ) |
|                               | Wildtype                                                     | 99 / 120       | 15.61    | 0.46   |                    |                       |
|                               | <i>nhr-49(nr2041) lof</i>                                    | 101 / 119      | 7.66     | 0.2    | < 0.0001           |                       |
| Neurons                       | <i>Punc-119::nhr-49(et7)::GFP + Pmyo-2::mCherry</i>          | 61 / 80        | 12.63    | 0.76   | 0.023              | < 0.0001              |
| Hypodermis                    | <i>Pcol-12::nhr-49(et7)::GFP + Pmyo-2::mCherry</i>           | 82 / 100       | 11.11    | 0.63   | < 0.0001           | < 0.0001              |
| Neurons                       | <i>nhr-49;[Punc-119::nhr-49(et7)::GFP + Pmyo-2::mCherry]</i> | 69 / 89        | 9.31     | 0.38   | < 0.0001           | 0.0004                |
| Trial 2†                      |                                                              |                |          |        |                    |                       |
|                               | Wildtype                                                     | 103 / 136      | 16.49    | 0.44   |                    |                       |
|                               | <i>nhr-49(nr2041) lof</i>                                    | 119 / 130      | 7.31     | 0.18   | < 0.0001           |                       |
| Neurons                       | <i>Punc-119::nhr-49(et7)::GFP + Pmyo-2::mCherry</i>          | 28 / 60        | 10.23    | 0.74   | < 0.0001           | < 0.0001              |
| Hypodermis                    | <i>Pcol-12::nhr-49(et7)::GFP + Pmyo-2::mCherry</i>           | 60 / 90        | 9.09     | 0.53   | < 0.0001           | 0.0003                |
| Neurons                       | <i>nhr-49;[Punc-119::nhr-49(et7)::GFP + Pmyo-2::mCherry]</i> | 98 / 134       | 8.75     | 0.23   | < 0.0001           | < 0.0001              |

Special characters #, ~, \$, ◇, † on trial headings denote the trial was performed at the same time as correspondingly-labeled trials in Table S2A. Underlined Trials shown in Fig. 6.

**Table S6b: Impact of Fenofibrate supplementation on PA14 survival of *nhr-49* mutants expressing NHR-49 in muscles (*myo-3*) or hypodermis (*col-12*)**

| SURVIVAL ON PA14     |                                                                         |             |                |          |        |                    |
|----------------------|-------------------------------------------------------------------------|-------------|----------------|----------|--------|--------------------|
| Tissue of Expression | Genotype                                                                | Treatment   | Trial 1        |          |        | Bonferroni P value |
|                      |                                                                         |             | n = obs/ total | Mean (h) | SE +/- | P (vs Control)     |
| Muscle               | <i>nhr-49</i> ;[ <i>Pmyo-3::nhr-49::GFP</i> + <i>Pmyo-2::mCherry</i> ]  | Control     | 62 / 88        | 57.88    | 1.55   |                    |
|                      |                                                                         | Fenofibrate | 66 / 100       | 59.35    | 1.36   | 1                  |
| Hypodermis           | <i>nhr-49</i> ;[ <i>Pcol-12::nhr-49::GFP</i> + <i>Pmyo-2::mCherry</i> ] | Control     | 100 / 133      | 63.59    | 0.93   |                    |
|                      |                                                                         | Fenofibrate | 111 / 135      | 62.56    | 1.07   | 1                  |
| Trial 2              |                                                                         |             |                |          |        |                    |
| Muscle               | <i>nhr-49</i> ;[ <i>Pmyo-3::nhr-49::GFP</i> + <i>Pmyo-2::mCherry</i> ]  | Control     | 57 / 71        | 52.76    | 1.48   |                    |
|                      |                                                                         | Fenofibrate | 117 / 120      | 55.35    | 1.29   | 0.6649             |
| Hypodermis           | <i>nhr-49</i> ;[ <i>Pcol-12::nhr-49::GFP</i> + <i>Pmyo-2::mCherry</i> ] | Control     | 94 / 120       | 61.2     | 1.37   |                    |
|                      |                                                                         | Fenofibrate | 89 / 105       | 64.22    | 1.24   | 1                  |
| Trial 3              |                                                                         |             |                |          |        |                    |
| Muscle               | <i>nhr-49</i> ;[ <i>Pmyo-3::nhr-49::GFP</i> + <i>Pmyo-2::mCherry</i> ]  | Control     | 43 / 45        | 60.47    | 2.38   |                    |
|                      |                                                                         | Fenofibrate | 54 / 58        | 66.54    | 1.53   | 0.6314             |
| Hypodermis           | <i>nhr-49</i> ;[ <i>Pcol-12::nhr-49::GFP</i> + <i>Pmyo-2::mCherry</i> ] | Control     | 63 / 81        | 68.34    | 1.46   |                    |
|                      |                                                                         | Fenofibrate | 126 / 154      | 68.89    | 1.07   | 1                  |
| Trial 4              |                                                                         |             |                |          |        |                    |
| Muscle               | <i>nhr-49</i> ;[ <i>Pmyo-3::nhr-49::GFP</i> + <i>Pmyo-2::mCherry</i> ]  | Control     | 132 / 150      | 60.41    | 1.07   |                    |
|                      |                                                                         | Fenofibrate | 127 / 149      | 59.22    | 1      | 1                  |
| Hypodermis           | <i>nhr-49</i> ;[ <i>Pcol-12::nhr-49::GFP</i> + <i>Pmyo-2::mCherry</i> ] | Control     | 114 / 152      | 61.42    | 1.42   |                    |
|                      |                                                                         | Fenofibrate | 130 / 151      | 58.43    | 1.03   | 1                  |
| Trial 5              |                                                                         |             |                |          |        |                    |
| Muscle               | <i>nhr-49</i> ;[ <i>Pmyo-3::nhr-49::GFP</i> + <i>Pmyo-2::mCherry</i> ]  | Control     | 135/150        | 55.43    | 1.08   |                    |
|                      |                                                                         | Fenofibrate | 124/153        | 52.82    | 1.05   | 0.9918             |
| Hypodermis           | <i>nhr-49</i> ;[ <i>Pcol-12::nhr-49::GFP</i> + <i>Pmyo-2::mCherry</i> ] | Control     | 112/151        | 55.04    | 1.24   |                    |
|                      |                                                                         | Fenofibrate | 120/150        | 53.38    | 1.12   | 1                  |

**Table S7a: Impact of endogenous promoter-driven NHR-49 expression on survival of *glp-1* mutants on PA14 (a.1) and OP50 (a.2)**

| <b>Table S7a. 1: SURVIVAL ON PA14</b> |                                                               |                           |                 |               |                           |                                |
|---------------------------------------|---------------------------------------------------------------|---------------------------|-----------------|---------------|---------------------------|--------------------------------|
| <b>Strain</b>                         | <b>Background/Genotype</b>                                    | <b>Trial 1*</b>           |                 |               | <b>Bonferroni P-value</b> |                                |
|                                       |                                                               | <b>n = obs/<br/>total</b> | <b>Mean (h)</b> | <b>SE +/-</b> | <b>P (vs N2)</b>          | <b>P (vs<br/><i>glp-1</i>)</b> |
| WT                                    | Wildtype                                                      | 83 / 105                  | 67.31           | 1.37          |                           |                                |
| CF1903                                | <i>glp-1</i>                                                  | 116 / 127                 | 83.68           | 2.04          | <0.0001                   |                                |
| AGP29                                 | <i>glp-1 glmEx6 [Pnhr-49::nhr-49<br/>::GFP + Pmyo-2::mCh]</i> | 105 / 112                 | 38.6            | 1.57          | <0.0001                   | <0.0001                        |
| <b>Trial 2#</b>                       |                                                               |                           |                 |               |                           |                                |
| WT                                    | Wildtype                                                      | 61/112                    | 72.21           | 3.63          |                           |                                |
| CF1903                                | <i>glp-1</i>                                                  | 95/109                    | 88.89           | 2.57          | 0.001                     |                                |
| AGP29                                 | <i>glp-1 glmEx6 [Pnhr-49::nhr-49<br/>::GFP + Pmyo-2::mCh]</i> | 98/115                    | 44.15           | 1.92          | <0.0001                   | <0.0001                        |
| <b>Trial 3^</b>                       |                                                               |                           |                 |               |                           |                                |
| WT                                    | Wildtype                                                      | 68 / 120                  | 68.39           | 2.2           |                           |                                |
| CF1903                                | <i>glp-1</i>                                                  | 102 / 117                 | 94.91           | 3.2           | 0.0001                    |                                |
| AGP29                                 | <i>glp-1 glmEx6 [Pnhr-49::nhr-49<br/>::GFP + Pmyo-2::mCh]</i> | 94 / 105                  | 39.35           | 1.56          | 0.0001                    | 0.0001                         |
| <b>Trial 4</b>                        |                                                               |                           |                 |               |                           |                                |
| WT                                    | Wildtype                                                      | 88 / 128                  | 92.05           | 1.99          |                           |                                |
| CF1903                                | <i>glp-1</i>                                                  | 101 / 131                 | 106.42          | 2.74          | 0.0004                    |                                |
| AGP29                                 | <i>glp-1 glmEx6 [Pnhr-49::nhr-49<br/>::GFP + Pmyo-2::mCh]</i> | 132 / 156                 | 53.58           | 2.18          | <0.0001                   | <0.0001                        |
| <b>Table S7a.2: SURVIVAL ON OP50</b>  |                                                               |                           |                 |               |                           |                                |
| <b>Strain</b>                         | <b>Background/Genotype</b>                                    | <b>Trial 1@</b>           |                 |               | <b>Bonferroni P-value</b> |                                |
|                                       |                                                               | <b>n = obs/<br/>total</b> | <b>Mean (h)</b> | <b>SE +/-</b> | <b>P (vs N2)</b>          | <b>P (vs<br/><i>glp-1</i>)</b> |
| AGP22                                 | <i>nhr-49;glp-1</i>                                           | 72/72                     | 11.27           | 0.26          |                           | <0.0001                        |
| CF1903                                | <i>glp-1</i>                                                  | 65/77                     | 25.78           | 0.98          |                           |                                |
| AGP29                                 | <i>glp-1 glmEx6 [Pnhr-49::nhr-49<br/>::GFP + Pmyo-2::mCh]</i> | 13/14                     | 22.62           | 1.85          |                           | 0.0755                         |
| <b>Trial 2~</b>                       |                                                               |                           |                 |               |                           |                                |
| WT                                    | Wildtype                                                      | 82 / 122                  | 15.53           | 0.58          |                           |                                |
| CF1903                                | <i>glp-1</i>                                                  | 112 / 124                 | 22.98           | 0.67          | <0.0001                   |                                |
| AGP29                                 | <i>glp-1 glmEx6 [Pnhr-49::nhr-49<br/>::GFP + Pmyo-2::mCh]</i> | 94 / 108                  | 21.31           | 0.42          | <0.0001                   | 0.003                          |
| <b>Trial 3\$</b>                      |                                                               |                           |                 |               |                           |                                |
| WT                                    | Wildtype                                                      | 73 / 121                  | 17.81           | 0.56          |                           |                                |
| CF1903                                | <i>glp-1</i>                                                  | 101 / 114                 | 23.35           | 0.69          | <0.0001                   |                                |
| AGP29                                 | <i>glp-1 glmEx6 [Pnhr-49::nhr-49<br/>::GFP + Pmyo-2::mCh]</i> | 55 / 120                  | 21.71           | 0.53          | <0.0001                   | 0.3082                         |

Special characters \*, #, ^, &, @, ~ on different tabs/sub-sections of Table S7 denote trials performed at the same time. Underlined Trials shown in Fig. S5

**Table S7b: Impact of neuronal (*unc-119*) promoter-driven NHR-49 expression on survival of *glp-1* mutants on PA14 (b.1) and OP50 (b.2)**

| Table S7a.1: SURVIVAL ON PA14 |                                                            |                   |          |        |                    |                      |
|-------------------------------|------------------------------------------------------------|-------------------|----------|--------|--------------------|----------------------|
| Strain                        | Background/Genotype                                        | Trial 1*          |          |        | Bonferroni P-value |                      |
|                               |                                                            | n = obs/<br>total | Mean (h) | SE +/- | P (vs N2)          | P (vs <i>glp-1</i> ) |
| WT                            | Wildtype                                                   | 83 / 105          | 67.31    | 1.37   |                    |                      |
| CF1903                        | <i>glp-1</i>                                               | 116 / 127         | 83.68    | 2.04   | <0.0001            |                      |
| AGP105                        | <i>glp-1 glmEx20 [Punc-119::nhr-49::GFP + Pmyo-2::mCh]</i> | 97 / 117          | 70.81    | 2.96   | 0.0174             | 0.242                |
| Trial 2#                      |                                                            |                   |          |        |                    |                      |
| WT                            | Wildtype                                                   | 61/112            | 72.21    | 3.63   |                    |                      |
| CF1903                        | <i>glp-1</i>                                               | 95/109            | 88.89    | 2.57   | 0.001              |                      |
| AGP105                        | <i>glp-1 glmEx20 [Punc-119::nhr-49::GFP + Pmyo-2::mCh]</i> | 111/120           | 59.86    | 3.3    | 0.1603             | <0.0001              |
| Trial 3^                      |                                                            |                   |          |        |                    |                      |
| WT                            | Wildtype                                                   | 68 / 120          | 68.39    | 2.2    |                    |                      |
| CF1903                        | <i>glp-1</i>                                               | 102 / 117         | 94.91    | 3.2    | 0.0001             |                      |
| AGP105                        | <i>glp-1 glmEx20 [Punc-119::nhr-49::GFP + Pmyo-2::mCh]</i> | 73 / 80           | 73.22    | 4.93   | 1                  | 0.0582               |
| Table S7b.2: SURVIVAL ON OP50 |                                                            |                   |          |        |                    |                      |
| Strain                        | Background/Genotype                                        | Trial 1           |          |        | Bonferroni P-value |                      |
|                               |                                                            | n = obs/<br>total | Mean (h) | SE +/- | P (vs N2)          | P (vs <i>glp-1</i> ) |
| WT                            | Wildtype                                                   | 52/71             | 16.26    | 0.91   |                    |                      |
| CF1903                        | <i>glp-1</i>                                               | 51/70             | 24.43    | 1.08   | <0.0001            |                      |
| AGP105                        | <i>glp-1 glmEx20 [Punc-119::nhr-49::GFP + Pmyo-2::mCh]</i> | 29 / 42           | 21.78    | 1.86   | 0.01               | 1                    |
| Trial 2                       |                                                            |                   |          |        |                    |                      |
| WT                            | Wildtype                                                   | 74 / 91           | 24.2     | 0.55   |                    |                      |
| CF1903                        | <i>glp-1</i>                                               | 120 / 124         | 30.54    | 0.79   | <0.0001            |                      |
| AGP105                        | <i>glp-1 glmEx20 [Punc-119::nhr-49::GFP + Pmyo-2::mCh]</i> | 70 / 80           | 31.4     | 1.1    | <0.0001            | 1                    |
| Trial 3                       |                                                            |                   |          |        |                    |                      |
| WT                            | Wildtype                                                   | 71 / 100          | 23.8     | 0.58   |                    |                      |
| CF1903                        | <i>glp-1</i>                                               | 83 / 84           | 22.58    | 1.06   | 1                  |                      |
| AGP105                        | <i>glp-1 glmEx20 [Punc-119::nhr-49::GFP + Pmyo-2::mCh]</i> | 51 / 63           | 26.69    | 0.74   | 0.1157             | 1                    |
| Trial 4                       |                                                            |                   |          |        |                    |                      |
| WT                            | Wildtype                                                   | 71 / 82           | 17.99    | 0.58   |                    |                      |
| CF1903                        | <i>glp-1</i>                                               | 109 / 121         | 24.25    | 0.91   | <0.0001            |                      |
| AGP105                        | <i>glp-1 glmEx20 [Punc-119::nhr-49::GFP + Pmyo-2::mCh]</i> | 99 / 120          | 28.14    | 0.89   | <0.0001            | 0.38                 |

Special characters \*, #, ^, &, @, ~ on different tabs/sub-sections of Table S7 denote trials performed at the same time. Underlined Trials shown in Fig. S5

**Table S7c: Impact of intestinal (*gly-19*) promoter-driven NHR-49 expression on survival of *glp-1* mutants on PA14 (c.1) and OP50 (c.2)**

| Table S7c. 1: SURVIVAL ON PA14 |                                                           |                   |          |        |                    |                      |
|--------------------------------|-----------------------------------------------------------|-------------------|----------|--------|--------------------|----------------------|
| Strain                         | Background/Genotype                                       | Trial 1*          |          |        | Bonferroni P-value |                      |
|                                |                                                           | n = obs/<br>total | Mean (h) | SE +/- | P (vs N2)          | P (vs <i>glp-1</i> ) |
| WT                             | Wildtype                                                  | 83 / 105          | 67.31    | 1.37   |                    |                      |
| CF1903                         | <i>glp-1</i>                                              | 116 / 127         | 83.68    | 2.04   | <0.0001            |                      |
| AGP44                          | <i>glp-1 glmEx10 [Pgly-19::nhr-49::GFP + Pmyo-2::mCh]</i> | 89 / 108          | 80.91    | 2.67   | <0.0001            | 1                    |
| Trial 2#                       |                                                           |                   |          |        |                    |                      |
| WT                             | Wildtype                                                  | 61/112            | 72.21    | 3.63   |                    |                      |
| CF1903                         | <i>glp-1</i>                                              | 95/109            | 88.89    | 2.57   | 0.001              |                      |
| AGP44                          | <i>glp-1 glmEx10 [Pgly-19::nhr-49::GFP + Pmyo-2::mCh]</i> | 106/120           | 69.98    | 2.52   | 1                  | <0.0001              |
| Trial 3^                       |                                                           |                   |          |        |                    |                      |
| WT                             | Wildtype                                                  | 68 / 120          | 68.39    | 2.2    |                    |                      |
| CF1903                         | <i>glp-1</i>                                              | 102 / 117         | 94.91    | 3.2    | 0.0001             |                      |
| AGP44                          | <i>glp-1 glmEx10 [Pgly-19::nhr-49::GFP + Pmyo-2::mCh]</i> | 97 / 115          | 82.13    | 2.71   | 0.0044             | 0.0086               |
| Table S7c.2: SURVIVAL ON OP50  |                                                           |                   |          |        |                    |                      |
| Strain                         | Background/Genotype                                       | Trial 1@          |          |        | Bonferroni P-value |                      |
|                                |                                                           | n = obs/<br>total | Mean (h) | SE +/- | P (vs N2)          | P (vs <i>glp-1</i> ) |
| AGP22                          | <i>nhr-49;glp-1</i>                                       | 72/72             | 11.27    | 0.26   |                    | <0.0001              |
| CF1903                         | <i>glp-1</i>                                              | 65/77             | 25.78    | 0.98   |                    |                      |
| AGP44                          | <i>glp-1 glmEx10 [Pgly-19::nhr-49::GFP + Pmyo-2::mCh]</i> | 26/27             | 20.06    | 1.09   |                    | 0.0003               |
| Trial 2~                       |                                                           |                   |          |        |                    |                      |
| WT                             | Wildtype                                                  | 82 / 122          | 15.53    | 0.58   |                    |                      |
| CF1903                         | <i>glp-1</i>                                              | 112 / 124         | 22.98    | 0.67   | <0.0001            |                      |
| AGP44                          | <i>glp-1 glmEx10 [Pgly-19::nhr-49::GFP + Pmyo-2::mCh]</i> | 105 / 122         | 20.69    | 0.44   | <0.0001            | 0.0002               |
| Trial 3\$                      |                                                           |                   |          |        |                    |                      |
| WT                             | Wildtype                                                  | 73 / 121          | 17.81    | 0.56   |                    |                      |
| CF1903                         | <i>glp-1</i>                                              | 101 / 114         | 23.35    | 0.69   | <0.0001            |                      |
| AGP44                          | <i>glp-1 glmEx10 [Pgly-19::nhr-49::GFP + Pmyo-2::mCh]</i> | 101 / 116         | 20.93    | 0.41   | 0.0004             | 0.0004               |

Special characters \*, #, ^, &, @, ~ on different tabs/sub-sections of Table S7 denote trials performed at the same time. Underlined Trials shown in Fig. S5

**Table S7d: Impact of muscle (*myo-3*) promoter-driven NHR-49 expression on survival of *glp-1* mutants on PA14 (d.1) and OP50 (d.2)**

| Table S7d. 1: SURVIVAL ON PA14 |                                                         |                   |          |        |                    |                         |
|--------------------------------|---------------------------------------------------------|-------------------|----------|--------|--------------------|-------------------------|
| Strain                         | Background/Genotype                                     | Trial 1*          |          |        | Bonferroni P-value |                         |
|                                |                                                         | n = obs/<br>total | Mean (h) | SE +/- | P (vs N2)          | P (vs<br><i>glp-1</i> ) |
| WT                             | Wildtype                                                | 83 / 105          | 67.31    | 1.37   |                    |                         |
| CF1903                         | <i>glp-1</i>                                            | 116 / 127         | 83.68    | 2.04   | <0.0001            |                         |
| AGP36                          | <i>glp-1 glmEx7 [Pmyo-3::nhr-49::GFP + Pmyo-2::mCh]</i> | 96 / 118          | 73.05    | 2.12   | 0.0378             | 0.0107                  |
| Trial 2#                       |                                                         |                   |          |        |                    |                         |
| WT                             | Wildtype                                                | 61/112            | 72.21    | 3.63   |                    |                         |
| CF1903                         | <i>glp-1</i>                                            | 95/109            | 88.89    | 2.57   | 0.001              |                         |
| AGP36                          | <i>glp-1 glmEx7 [Pmyo-3::nhr-49::GFP + Pmyo-2::mCh]</i> | 110/120           | 80.21    | 2.84   | 0.3629             | 0.6544                  |
| Trial 3^                       |                                                         |                   |          |        |                    |                         |
| WT                             | Wildtype                                                | 68 / 120          | 68.39    | 2.2    |                    |                         |
| CF1903                         | <i>glp-1</i>                                            | 102 / 117         | 94.91    | 3.2    | 0.0001             |                         |
| AGP36                          | <i>glp-1 glmEx7 [Pmyo-3::nhr-49::GFP + Pmyo-2::mCh]</i> | 110 / 120         | 88.62    | 2.93   | <0.0001            | 0.747                   |
| Table S7d.2: SURVIVAL ON OP50  |                                                         |                   |          |        |                    |                         |
| Strain                         | Background/Genotype                                     | Trial 1@          |          |        | Bonferroni P-value |                         |
|                                |                                                         | n = obs/<br>total | Mean (h) | SE +/- | P (vs N2)          | P (vs<br><i>glp-1</i> ) |
| AGP22                          | <i>nhr-49;glp-1</i>                                     | 72/72             | 11.27    | 0.26   |                    | <0.0001                 |
| CF1903                         | <i>glp-1</i>                                            | 65/77             | 25.78    | 0.98   |                    |                         |
| AGP36                          | <i>glp-1 glmEx7 [Pmyo-3::nhr-49::GFP + Pmyo-2::mCh]</i> | 46/83             | 24.65    | 0.98   |                    | 1                       |
| Trial 2\$                      |                                                         |                   |          |        |                    |                         |
| WT                             | Wildtype                                                | 73 / 121          | 17.81    | 0.56   |                    |                         |
| CF1903                         | <i>glp-1</i>                                            | 101 / 114         | 23.35    | 0.69   | <0.0001            |                         |
| AGP36                          | <i>glp-1 glmEx7 [Pmyo-3::nhr-49::GFP + Pmyo-2::mCh]</i> | 104 / 121         | 21.89    | 0.55   | <0.0001            | 0.3937                  |

Special characters \*, #, ^, &, @, ~ on different tabs/sub-sections of Table S7 denote trials performed at the same time. Underlined Trials shown in Fig. S5

**Table S7e: Impact of hypodermal (*col-12*) promoter-driven NHR-49 expression on survival of *glp-1* mutants on PA14 (e.1) and OP50 (e.2)**

| <b>Table S7e.1: SURVIVAL ON PA14</b> |                                                           |                   |          |        |                    |                         |
|--------------------------------------|-----------------------------------------------------------|-------------------|----------|--------|--------------------|-------------------------|
| Strain                               | Background/Genotype                                       | Trial 1*          |          |        | Bonferroni P-value |                         |
|                                      |                                                           | n = obs/<br>total | Mean (h) | SE +/- | P (vs N2)          | P (vs<br><i>glp-1</i> ) |
| WT                                   | Wildtype                                                  | 83 / 105          | 67.31    | 1.37   |                    |                         |
| CF1903                               | <i>glp-1</i>                                              | 116 / 127         | 83.68    | 2.04   | <0.0001            |                         |
| AGP41                                | <i>glp-1 glmEx11 [Pcol-12::nhr-49::GFP + Pmyo-2::mCh]</i> | 80 / 98           | 69.92    | 2.58   | 0.0674             | 0.009                   |
| <b>Trial 2#</b>                      |                                                           |                   |          |        |                    |                         |
| WT                                   | Wildtype                                                  | 61/112            | 72.21    | 3.63   |                    |                         |
| CF1903                               | <i>glp-1</i>                                              | 95/109            | 88.89    | 2.57   | 0.001              |                         |
| AGP36                                | <i>glp-1 glmEx7 [Pmyo-3::nhr-49::GFP + Pmyo-2::mCh]</i>   | 12./13            | 79.72    | 9.95   | 1                  | 1                       |
| <b>Trial 3^</b>                      |                                                           |                   |          |        |                    |                         |
| WT                                   | Wildtype                                                  | 68 / 120          | 68.39    | 2.2    |                    |                         |
| CF1903                               | <i>glp-1</i>                                              | 102 / 117         | 94.91    | 3.2    | 0.0001             |                         |
| AGP41                                | <i>glp-1 glmEx11 [Pcol-12::nhr-49::GFP + Pmyo-2::mCh]</i> | 47 / 60           | 65.17    | 4.78   | 1                  | <0.0001                 |
| <b>Table S7e.2: SURVIVAL ON OP50</b> |                                                           |                   |          |        |                    |                         |
| Strain                               | Background/Genotype                                       | Trial 1@          |          |        | Bonferroni P-value |                         |
|                                      |                                                           | n = obs/<br>total | Mean (h) | SE +/- | P (vs N2)          | P (vs<br><i>glp-1</i> ) |
| AGP22                                | <i>nhr-49;glp-1</i>                                       | 72/72             | 11.27    | 0.26   |                    | <0.0001                 |
| CF1903                               | <i>glp-1</i>                                              | 65/77             | 25.78    | 0.98   |                    |                         |
| AGP41                                | <i>glp-1 glmEx11 [Pcol-12::nhr-49::GFP + Pmyo-2::mCh]</i> | 28/42             | 24.06    | 0.83   |                    | 0.0611                  |
| <b>Trial 2\$</b>                     |                                                           |                   |          |        |                    |                         |
| WT                                   | Wildtype                                                  | 73 / 121          | 17.81    | 0.56   |                    |                         |
| CF1903                               | <i>glp-1</i>                                              | 101 / 114         | 23.35    | 0.69   | <0.0001            |                         |
| AGP41                                | <i>glp-1 glmEx11 [Pcol-12::nhr-49::GFP + Pmyo-2::mCh]</i> | 84 / 102          | 23.79    | 0.54   | <0.0001            | 1                       |

Special characters \*, #, ^, &, @, ~ on different tabs/sub-sections of Table S7 denote trials performed at the same time. Underlined Trials shown in Fig. S5

**Table S8: Comparison of lipid-catabolic genes regulated by NHR-49 in *glp-1* mutants and upon PA14 infection**

| Lipolysis Process                | Gene             | Wormbase Gene ID | Impact of Germline Loss [dependence on DAF-16 (D16), TCER-1 (T1) ( <i>Amrit et al., 2016</i> ) &/or NHR-49 (N49) ( <i>Ratnappan et al., 2014</i> )] | Studies documenting PA14-induced gene-expression changes |                                                 |                                            |                              |
|----------------------------------|------------------|------------------|-----------------------------------------------------------------------------------------------------------------------------------------------------|----------------------------------------------------------|-------------------------------------------------|--------------------------------------------|------------------------------|
|                                  |                  |                  |                                                                                                                                                     | <i>Troemel et al., 2006</i>                              | <i>Dasgupta et al., 2020</i> (only UP reported) | <i>Twumasi-Boateng &amp; Shapira, 2012</i> | <i>Fletcher et al., 2019</i> |
| Mitochondrial $\beta$ -oxidation | <i>acs-2</i>     | WBGene00009221   | UP (D16, T1, N49)                                                                                                                                   | UP                                                       | UP                                              |                                            |                              |
|                                  | <i>acs-22</i>    | WBGene00017012   | UP (T1, N49)                                                                                                                                        |                                                          |                                                 |                                            | DOWN                         |
|                                  | <i>cpt-5</i>     | WBGene00008629   | UP (N49)                                                                                                                                            |                                                          |                                                 |                                            | DOWN                         |
|                                  | <i>acdh-1</i>    | WBGene00016943   | UP (N49)                                                                                                                                            | DOWN                                                     | DOWN                                            |                                            | DOWN                         |
|                                  | <i>acdh-2</i>    | WBGene00015894   | UP (N49)                                                                                                                                            |                                                          |                                                 |                                            | DOWN                         |
|                                  | <i>acdh-9</i>    | WBGene00017874   | DOWN (T1, N49)                                                                                                                                      |                                                          |                                                 |                                            |                              |
|                                  | <i>acdh-11</i>   | WBGene00012860   | UP (T1, N49)                                                                                                                                        |                                                          |                                                 |                                            | DOWN                         |
|                                  | <i>ech-1.1</i>   | WBGene00001150   | UP (N49)                                                                                                                                            |                                                          |                                                 |                                            |                              |
|                                  | <i>ech-7</i>     | WBGene00001156   | UP (D16, T1, N49)                                                                                                                                   |                                                          |                                                 |                                            | DOWN                         |
|                                  | <i>hacd-1</i>    | WBGene00019978   | UP (D16, T1, N49)                                                                                                                                   | DOWN                                                     |                                                 | DOWN                                       | DOWN                         |
|                                  | <i>B0272.3</i>   | WBGene00007129   | UP (N49)                                                                                                                                            |                                                          |                                                 |                                            |                              |
|                                  | <i>aca-2</i>     | WBGene00009952   | UP (D16, T1, N49)                                                                                                                                   |                                                          |                                                 |                                            | DOWN                         |
| <i>kat-1</i>                     | WBGene00002183   | UP (N49)         |                                                                                                                                                     |                                                          |                                                 | DOWN                                       |                              |
| Peroxisomal $\beta$ -Oxidation   | <i>F08A8.2</i>   | WBGene00008565   | UP (D16, T1, N49)                                                                                                                                   | DOWN                                                     |                                                 |                                            |                              |
|                                  | <i>F08A8.3</i>   | WBGene00008566   | UP (T1, N49)                                                                                                                                        | DOWN                                                     |                                                 | DOWN                                       |                              |
|                                  | <i>F08A8.4/a</i> | WBGene00008567   | UP (T1, N49)                                                                                                                                        | DOWN                                                     |                                                 | DOWN                                       |                              |
|                                  | <i>acox-1.1</i>  | WBGene00008564   | UP (D16, T1, N49)                                                                                                                                   | UP                                                       | UP                                              | UP                                         | UP                           |
|                                  | <i>ech-9</i>     | WBGene00001158   | DOWN (N49)                                                                                                                                          | UP                                                       | UP                                              | UP                                         | UP                           |
| Lipases and Lipase-like Proteins | <i>lipl-1</i>    | WBGene00010062   | UP (D16, T1, N49)                                                                                                                                   | UP                                                       | UP                                              |                                            | UP                           |
|                                  | <i>lipl-2</i>    | WBGene00009773   | UP (D16, T1, N49)                                                                                                                                   |                                                          | UP                                              |                                            |                              |
|                                  | <i>lipl-3</i>    | WBGene00020016   | UP (N49)                                                                                                                                            |                                                          |                                                 |                                            | DOWN                         |
|                                  | <i>lipl-4</i>    | WBGene00019376   | UP (N49)                                                                                                                                            |                                                          |                                                 |                                            |                              |
|                                  | <i>lipl-5</i>    | WBGene00022642   | UP (D16, T1, N49)                                                                                                                                   | DOWN                                                     |                                                 | DOWN                                       | DOWN                         |
|                                  | <i>lipl-6</i>    | WBGene00021963   | UP (N49)                                                                                                                                            |                                                          |                                                 |                                            |                              |
|                                  | <i>lips-5</i>    | WBGene00011725   | UP (N49)                                                                                                                                            |                                                          |                                                 |                                            | UP                           |
|                                  | <i>lips-14</i>   | WBGene00019208   | UP (D16, T1, N49)                                                                                                                                   | DOWN                                                     |                                                 |                                            | DOWN                         |
|                                  | <i>lips-17</i>   | WBGene00019939   | UP (N49)                                                                                                                                            |                                                          |                                                 |                                            |                              |
|                                  | <i>fil-1</i>     | WBGene00011321   | DOWN (N49)                                                                                                                                          | UP                                                       | UP                                              |                                            | UP                           |

UP: Gene upregulated; DOWN: Gene downregulated; Genes similarly changed in *glp-1* vs. PA14 are highlighted in green and oppositely changes ones in red.



**Table S9: Impact of RNAi knockdown of NHR-49-target lipid metabolic genes and partner NHRs on survival of wildtype animals on PA14**

| RNAi treatment  | Trial 1        |          |        | P-value        |
|-----------------|----------------|----------|--------|----------------|
|                 | n = obs/ total | Mean (h) | SE +/- | P (vs Control) |
| Control         | 100 / 130      | 63.8     | 1.51   |                |
| <i>nhr-80</i>   | 82 / 131       | 57.9     | 1.35   | 0.003          |
| <i>nhr-71</i>   | 111 / 143      | 70.1     | 1.55   | 0.005          |
| <i>nhr-13</i>   | 104 / 124      | 61.14    | 1.19   | 0.093          |
| <i>acox-1.1</i> | 99 / 114       | 66.81    | 1.13   | 0.445          |
| <i>hacd-1</i>   | 89 / 133       | 61.39    | 1.31   | 0.147          |
| Trial 2         |                |          |        |                |
| Control         | 96 / 125       | 65.56    | 1.26   |                |
| <i>nhr-80</i>   | 103 / 125      | 62.2     | 1.26   | 0.062          |
| <i>nhr-71</i>   | 88 / 125       | 67.6     | 1.57   | 0.188          |
| <i>nhr-13</i>   | 95 / 125       | 65.89    | 1.16   | 0.909          |
| <i>acox-1.1</i> | 95 / 105       | 66.45    | 1.57   | 0.475          |
| <i>hacd-1</i>   | 88 / 107       | 70.05    | 1.88   | 0.016          |

**Table S10. Strains used in this study.**

| Strain                                       | Genotype                                                                                                                         | Source                 |
|----------------------------------------------|----------------------------------------------------------------------------------------------------------------------------------|------------------------|
| N2                                           | Wild type, Ghazi Lab                                                                                                             |                        |
| CF1903                                       | <i>glp-1(e2144ts)</i>                                                                                                            |                        |
| AGP12a                                       | <i>nhr-49(nr2041)</i> I Outcrossed Ghazi Lab N2 3x                                                                               |                        |
| AGP22                                        | <i>nhr-49(nr2041)I</i> ; <i>glp-1(e2141ts)III</i>                                                                                |                        |
| AGP110                                       | <i>nhr-49(et7)</i> . Outcrossed <i>nhr-49(et7)</i> to Ghazi Lab N2 4x                                                            | This study             |
| VC1668                                       | <i>fmo-2(ok2147)</i>                                                                                                             | CGC                    |
| RB1899                                       | <i>acs-2 (ok2457)</i>                                                                                                            | CGC                    |
| EB271                                        | <i>fmo-2p::gfp + rol-6(su1006)</i>                                                                                               | CGC                    |
| WBM170                                       | <i>wbmEx57 [acs-2p::GFP + rol-6(su1006)]</i>                                                                                     | Burkewitz et al., 2015 |
| AGP309                                       | <i>glp-1(e2144ts);fmo-2(ok2147)</i>                                                                                              | This study             |
| AGP308                                       | <i>glp-1(e2144ts);acs-2(ok2457)</i>                                                                                              | This study             |
| <b>NHR-49 Transgenic Strains</b>             |                                                                                                                                  |                        |
| <b>Wild Type Background</b>                  |                                                                                                                                  |                        |
| AGP24f                                       | <i>glmEx5[Pnhr-49::nhr-49::gfp + Pmyo-2::mCherry]</i>                                                                            | Ratnappan et al., 2014 |
| AGP27a                                       | <i>glmEx7[Pmyo-3::nhr-49::GFP + Pmyo-2::mCherry]</i>                                                                             | This study             |
| AGP40a                                       | <i>glmEx9[Pgly-19::nhr-49::GFP + Pmyo-2::mCherry]</i>                                                                            | This study             |
| AGP45                                        | <i>glmEx11[Pcol-12::nhr-49::GFP + Pmyo-2::mCherry]</i>                                                                           | This study             |
| AGP102a                                      | <i>glmEx20[Punc-119::nhr-49::GFP + Pmyo-2::mCherry]</i>                                                                          | This study             |
| <b><i>nhr-49</i> Mutant Background</b>       |                                                                                                                                  |                        |
| AGP33a                                       | <i>nhr-49(nr2041)I;glmEx5 [Pnhr-49::nhr-49::GFP + Pmyo-2::mCherry]</i>                                                           | This study             |
| AGP63                                        | <i>nhr-49(nr2041)I;glmEx8 [Pmyo-3::nhr-49::GFP + Pmyo-2::mCherry]</i>                                                            | This study             |
| AGP65                                        | <i>nhr-49(nr2041)I;glmEx9 [Pgly-19::nhr-49::GFP + Pmyo-2::mCherry]</i>                                                           | This study             |
| AGP53                                        | <i>nhr-49(nr2041)I;glmEx11 [Pcol-12::nhr-49::GFP + Pmyo-2::mCherry]</i>                                                          | This study             |
| AGP103a                                      | <i>nhr-49(nr2041)I;glmEx20[Punc-119::nhr-49::GFP + Pmyo-2::mCherry]</i>                                                          | This study             |
| <b><i>glp-1</i> Mutant Background</b>        |                                                                                                                                  |                        |
| AGP29d                                       | <i>glp-1(e2141ts)III;glmEx6[Pnhr-49::nhr-49::GFP + Pmyo-2::mCherry]</i> .<br>Obtained by crossing AGP28a x CF1903.               | This study             |
| AGP36a                                       | <i>glp-1(e2141ts)III;glmEx7[Pmyo-3::nhr-49::GFP + Pmyo-2::mCherry]</i>                                                           | This study             |
| AGP44                                        | <i>glp-1(e2141ts)III;glmEx10 [Pgly-19::nhr-49::GFP + Pmyo-2::mCherry]</i>                                                        | This study             |
| AGP41a/b                                     | <i>glp-1(e2141ts) III;glmEx11[Pcol-12::nhr-49::GFP + Pmyo-2::mCherry]</i>                                                        | This study             |
| AGP105a/b                                    | <i>glp-1(e2141)III;glmEx20[Punc-119::nhr-49::GFP + Pmyo-2::mCherry]</i>                                                          | This study             |
| <b><i>nhr-49;glp-1</i> Mutant Background</b> |                                                                                                                                  |                        |
| AGP34a                                       | <i>nhr-49(nr2041)I;glp-1(e2141ts)III;glmEx5 [Pnhr-49::nhr-49::GFP + Pmyo-2::mCherry]</i>                                         | This study             |
| AGP279                                       | <i>nhr-49(nr2041)I;glp-1(e2141ts)III;glmEx7 [Pmyo-3::nhr-49::GFP + Pmyo-2::mCherry]</i> .<br>Obtained by crossing AGP36 x AGP12a | This study             |
| AGP43                                        | <i>nhr-49(nr2041)I;glp-1(e2141)III;glmEx10 [Pgly-19::nhr-49::GFP + Pmyo-2::mCherry]</i>                                          | This study             |
| AGP54a                                       | <i>nhr-49(nr2041);glp-1(e2141);glmEx11 [Pcol-12::nhr-49::GFP + Pmyo-2::mCherry]</i>                                              | This study             |
| AGP70a/b                                     | <i>nhr-49(nr2041);glp-1(e2141);glmEx13 [Prgef-1::nhr-49::GFP + Pmyo-2::mCherry]</i>                                              | This study             |
| AGP115a/b                                    | <i>nhr-49(nr2041);glp-1(e2141);glmEx29 [Punc-119::nhr-49::GFP + Pmyo-2::mCherry]</i>                                             | This study             |

| <b>Tissue-specific <i>nhr-49(et7)</i> <i>gof</i> Expressing Strains</b> |                                                                                            |            |
|-------------------------------------------------------------------------|--------------------------------------------------------------------------------------------|------------|
| AGP311                                                                  | <i>glm21 [Pcol-12::<i>nhr-49(et7)::gfp</i> + <i>Pmyo-2::mCherry</i>]</i>                   | This study |
| AGP312                                                                  | <i>glm22 [Punc-119::<i>nhr-49(et7)::gfp</i> + <i>Pmyo-2::mCherry</i>]</i>                  | This study |
| AGP313                                                                  | <i>nhr-49(nr2041)I; glm22 [Punc-119::<i>nhr-49(et7)::gfp</i> + <i>Pmyo-2::mCherry</i>]</i> | This study |

| Table S11: Primers for cloning and qPCR experiments used in this study. |                                   |                      |                                         |                                           |
|-------------------------------------------------------------------------|-----------------------------------|----------------------|-----------------------------------------|-------------------------------------------|
| #                                                                       | Transgene                         | Description          | Forward Primer                          | Reverse Primer                            |
| 1                                                                       | <i>Pnhr-49::nhr-49::GFP</i>       | Endogenous promoter  | GCTAGCCTGCAGGGGACCAGAAAGAGCAAGAGCC      | TAAGCAGTCGACATCGTGAGAACGGAATGAGTTG        |
| 2                                                                       | <i>Pcol-12::nhr-49::GFP</i>       | Hypodermis Specific  | GCTAGCCTGCAGGTCAGTATTTGCTATTGAC         | TAAGCAGTCGACTTTTCTAAAAAGTAATCAAATC        |
| 3                                                                       | <i>Pgly-19::nhr-49::GFP</i>       | Intestine Specific   | GCTAGCCTGCAGGGCACC GCCGATTGATTGGGG      | TAAGCAGTCGACCAGAATTGAGAGTTCTCAATG         |
| 4                                                                       | <i>Pmyo-3::nhr-49::GFP</i>        | Muscle Specific      | GCTAGCCTGCAGGAGTGATTATAGTCTCTGTTT       | TAAGCAGTCGACCATTCTAGATGGATCTAGT           |
| 5                                                                       | <i>Punc-119::nhr-49::GFP</i>      | Neuron Specific      | GCTAGCCTGCAGGAGTAAAAGAAGTAGAATTTTATAG   | TAAGCAGTCGACATATGCTGTTGTAGCTGAAAATTTTG    |
| 6                                                                       | <i>prgef-1::nhr-49::GFP</i>       | Neuron Specific      | GCTAGCCTGCAGGGCGCAACATTGAATCCGACCAAGAGC | TAAGCAGTCGACCATCGTCGTCGTCGATGCCGCTTTCAGGA |
| 7                                                                       | <i>Pcol-12::nhr-49(et7)::GFP</i>  | Gain of Function     | CTTGCAGCTCtATTGGCAATTC                  | AGTTGCTGAGAGCATTCC                        |
| 8                                                                       | <i>Punc-119::nhr-49(et7)::GFP</i> |                      |                                         |                                           |
|                                                                         | Gene                              | Description          | Forward Primer                          | Reverse Primer                            |
| 9                                                                       | <i>nhr-49</i>                     | qPCR Primer          | TTGGCAGAGGTGGATTCTC                     | CTGTAAAGAGACCGGAGCC                       |
| 10                                                                      | <i>rpl-32</i>                     | qPCR Primer (Housek) | GATTCCCTTGCGGCTCTT                      | GATTCCCTTGCGGCTCTT                        |
